# Supplementary material
Source: ML conference proceedings conference paper supplement (https://openaccess.thecvf.com/content/cvpr_2016/html/Shi_A_Benchmark_Dataset_2016_CVPR_paper.html)

# **A Benchmark Dataset and Evaluation for Non-Lambertian and Uncalibrated Photometric Stereo – Supplementary Material**

Boxin Shi<sup>1,2</sup> Zhe Wu<sup>2,3</sup> Zhipeng Mo<sup>2</sup> Dinglong Duan<sup>3</sup> Sai-Kit Yeung<sup>2</sup> Ping Tan<sup>4</sup>

<sup>1</sup>Artificial Intelligence Research Center, National Institute of AIST

<sup>2</sup>Singapore University of Technology and Design

<sup>3</sup>National University of Singapore <sup>4</sup>Simon Fraser University

---

We show the complete results of estimated surface normals and their difference maps w.r.t. the ‘ground truth’ normals for the evaluated methods. Each page in the following shows results of all objects for one evaluated method according to each subplot of Figure 2 and Figure 4 in our paper. The numbers on each difference map indicate the mean angular errors in degrees.

Non-Lambertian methods

BASELINE

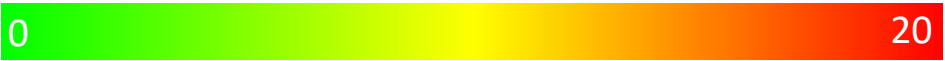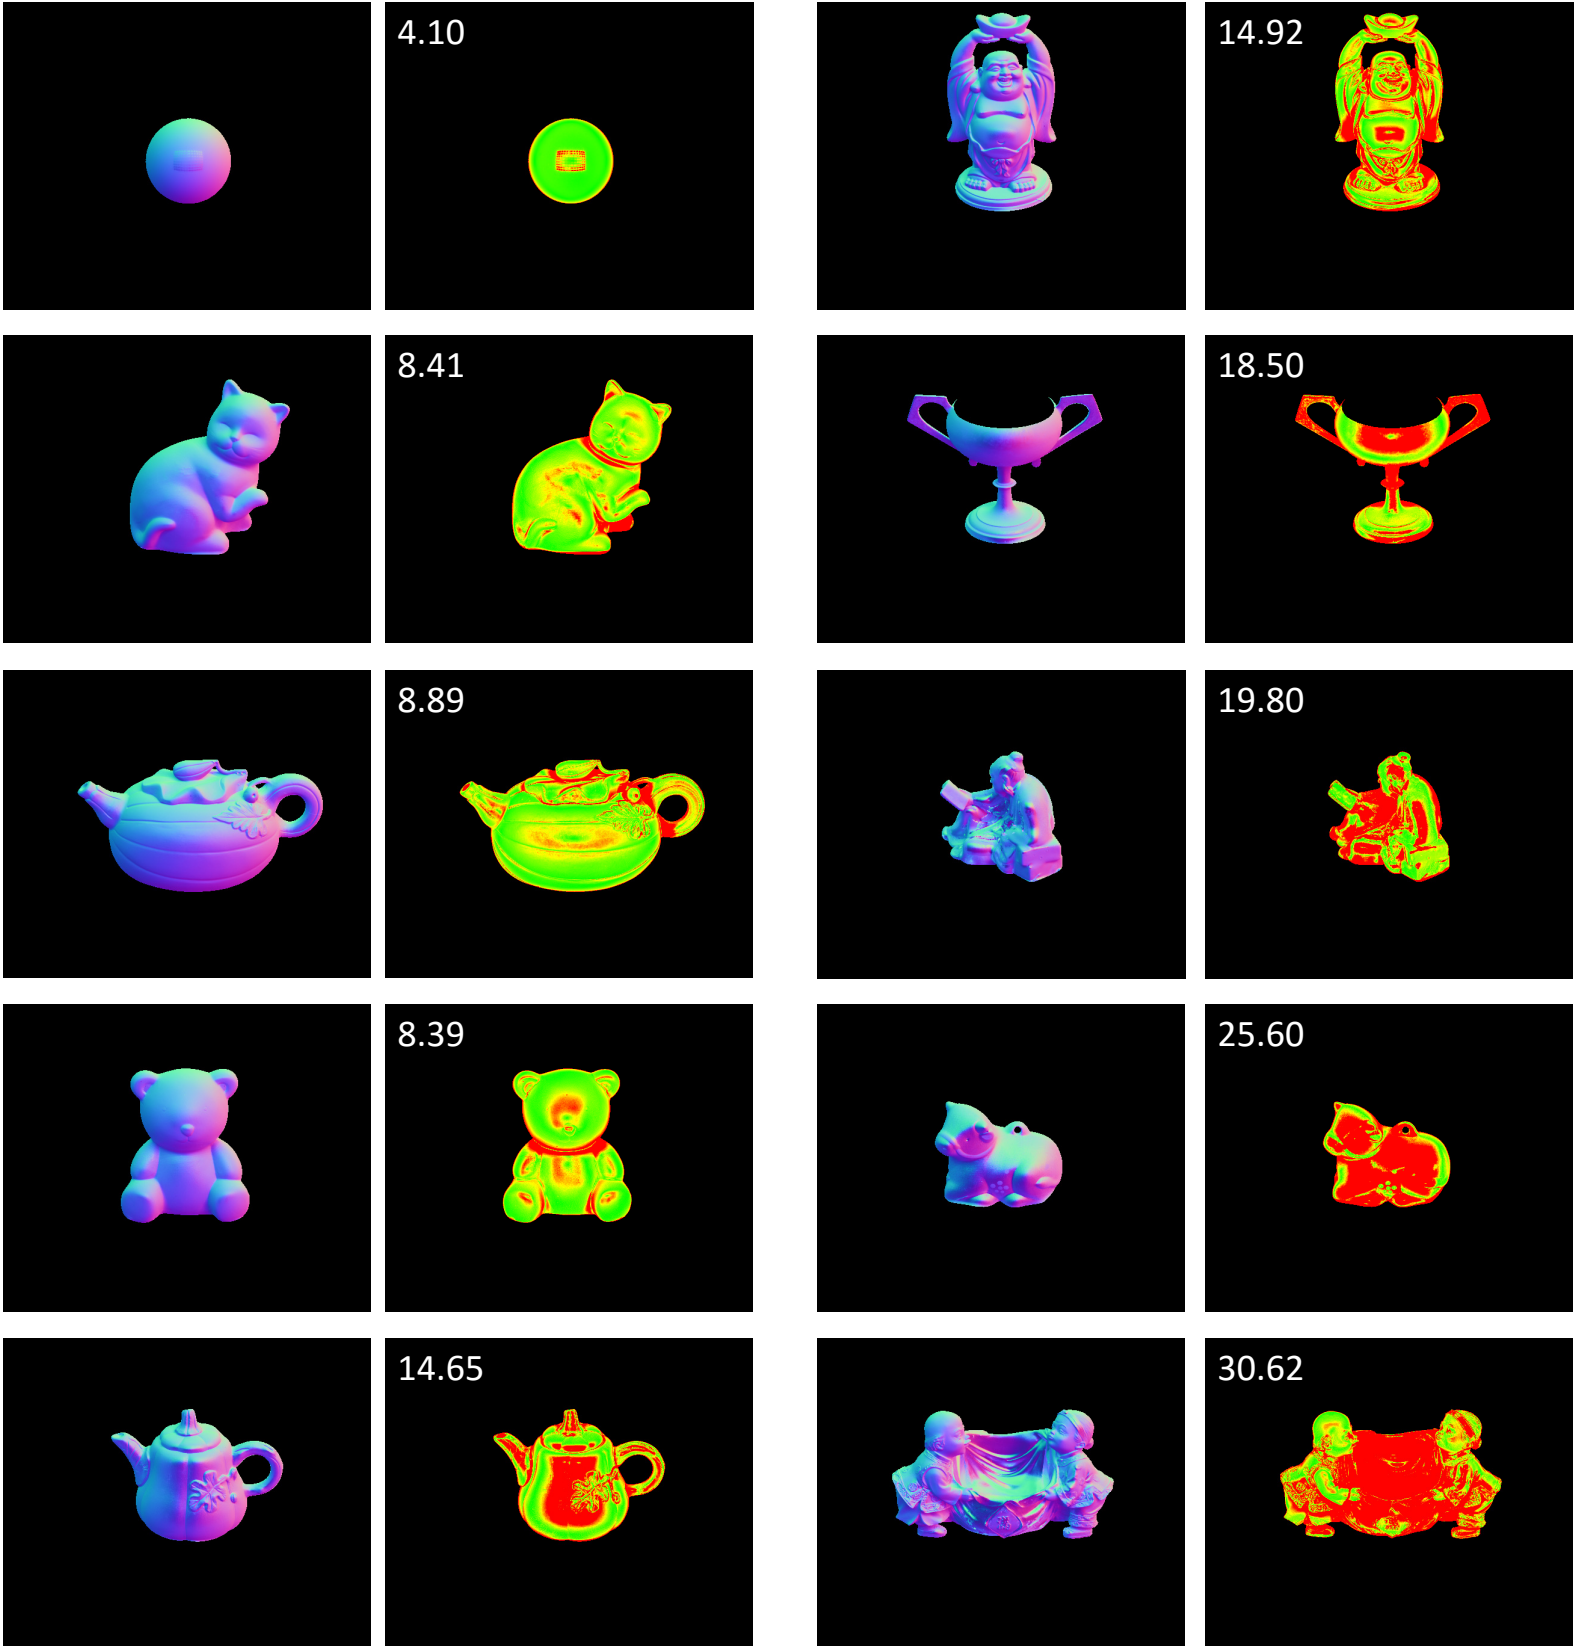

Non-Lambertian methods

WG10

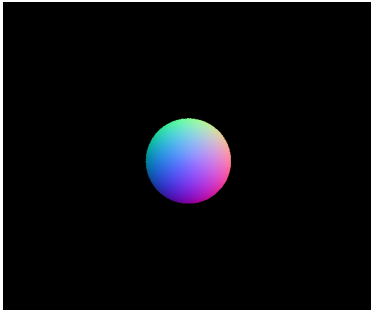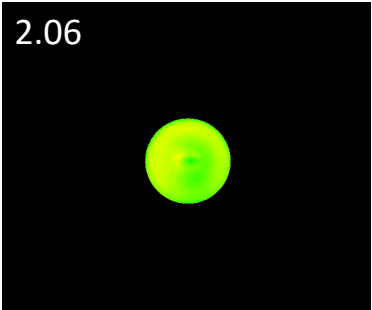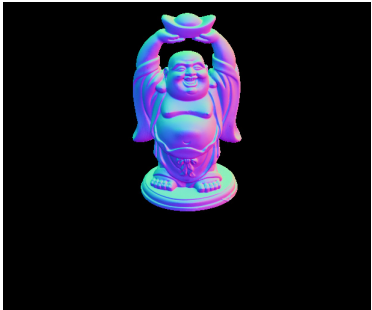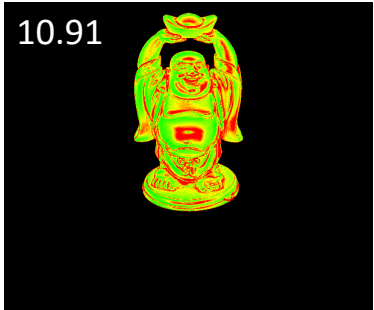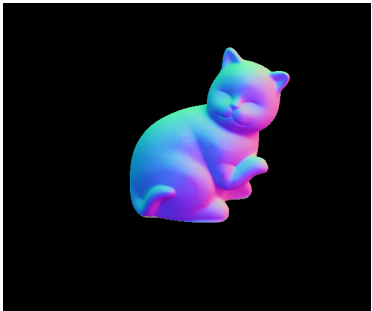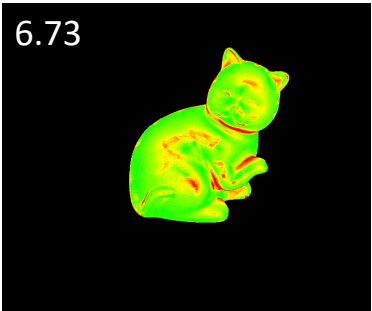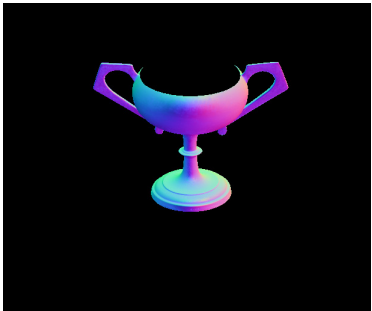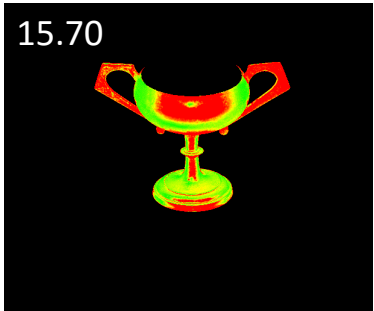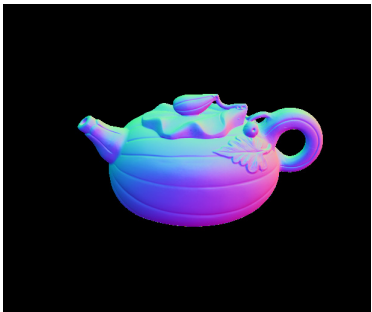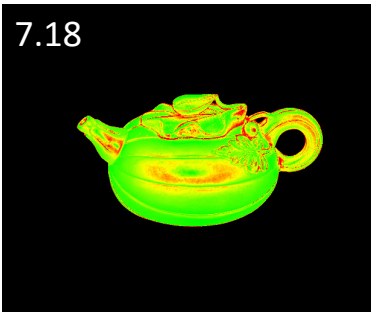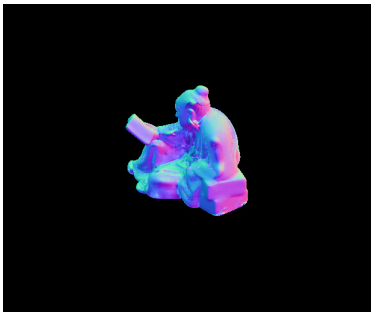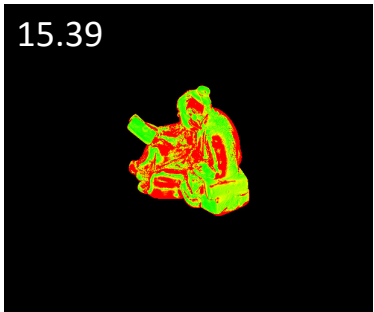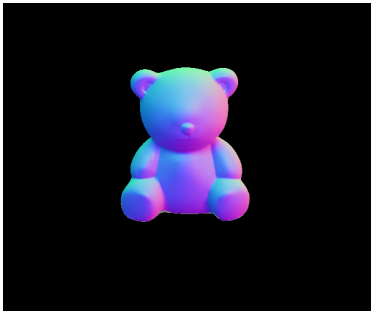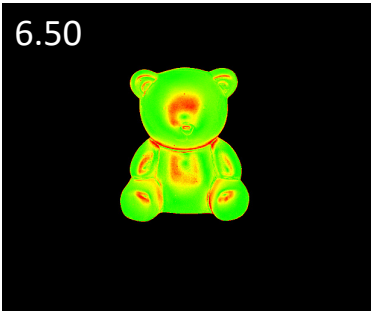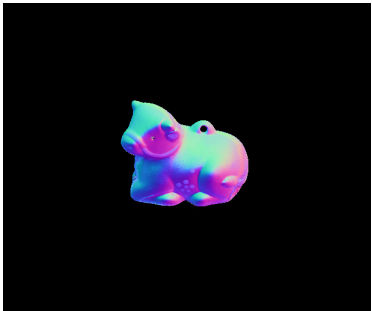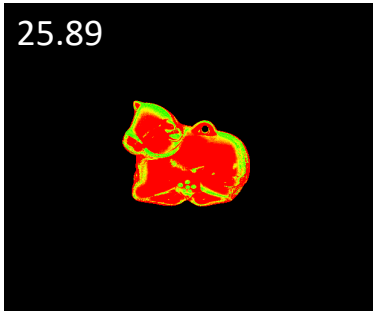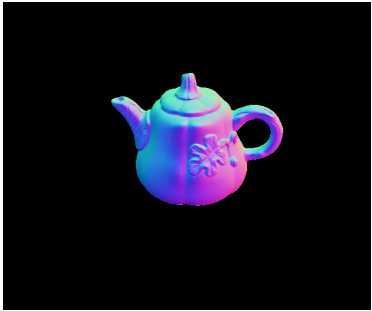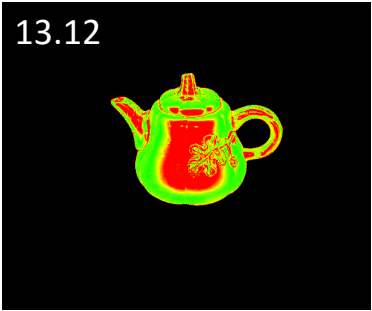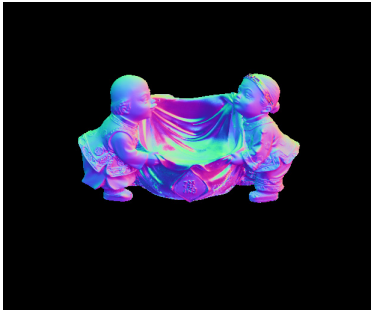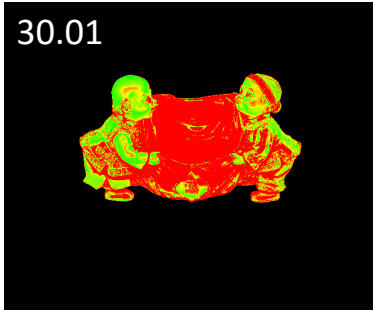

IW12

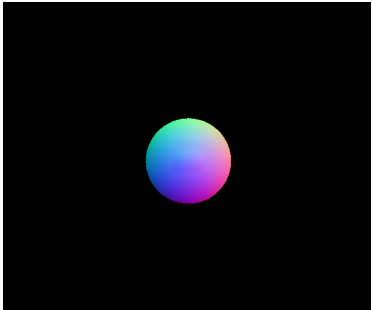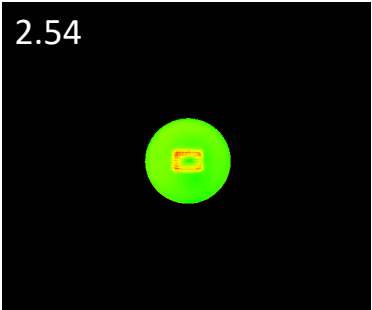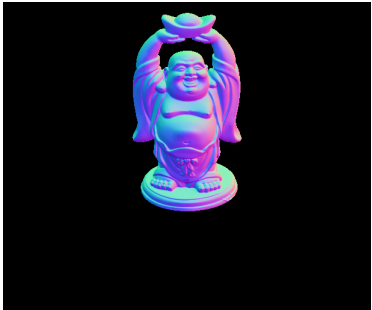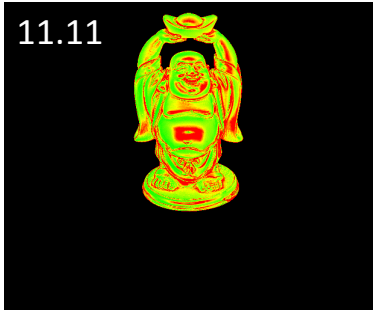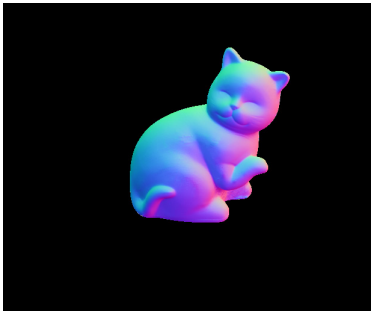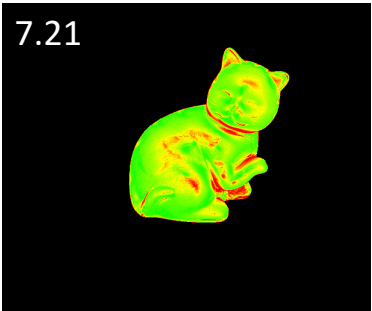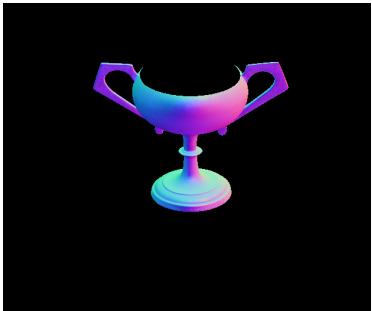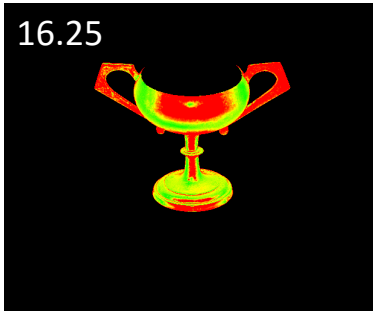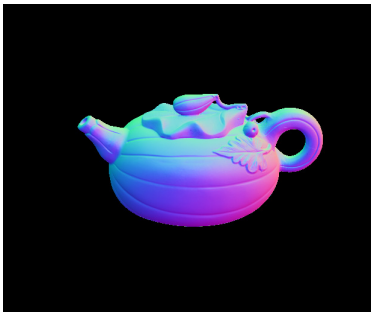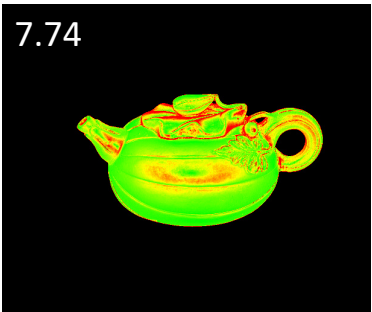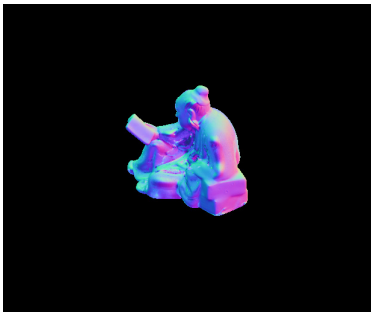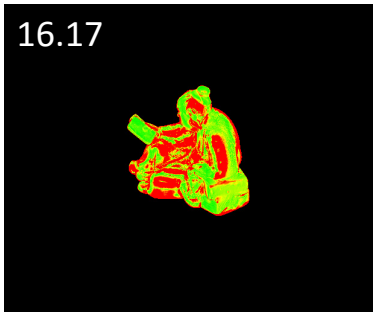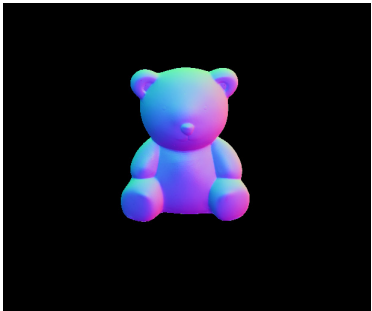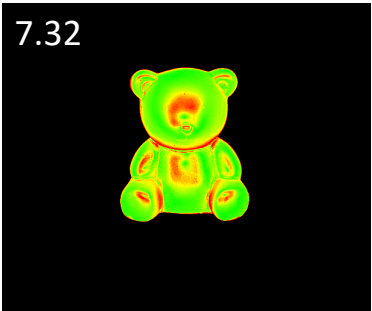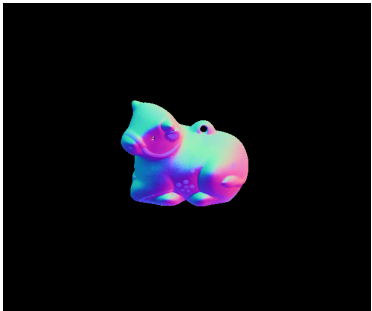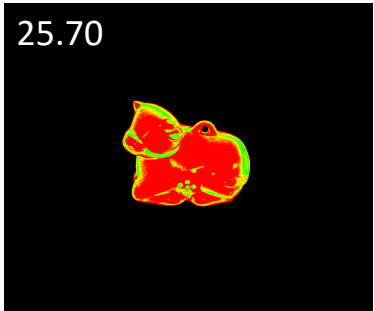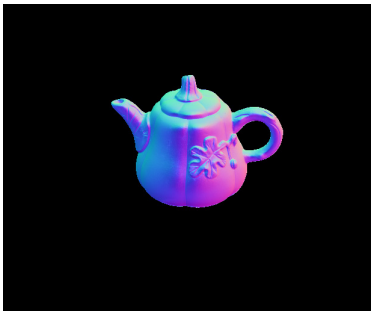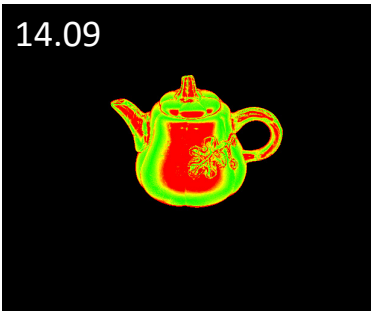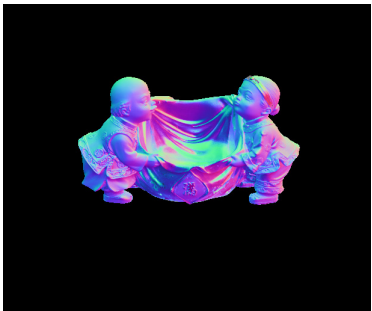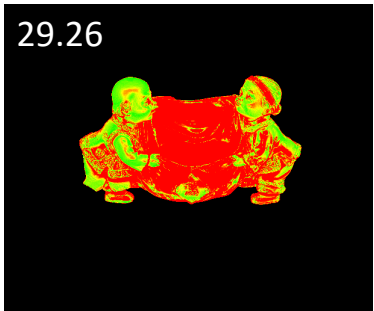



Non-Lambertian methods

GC10

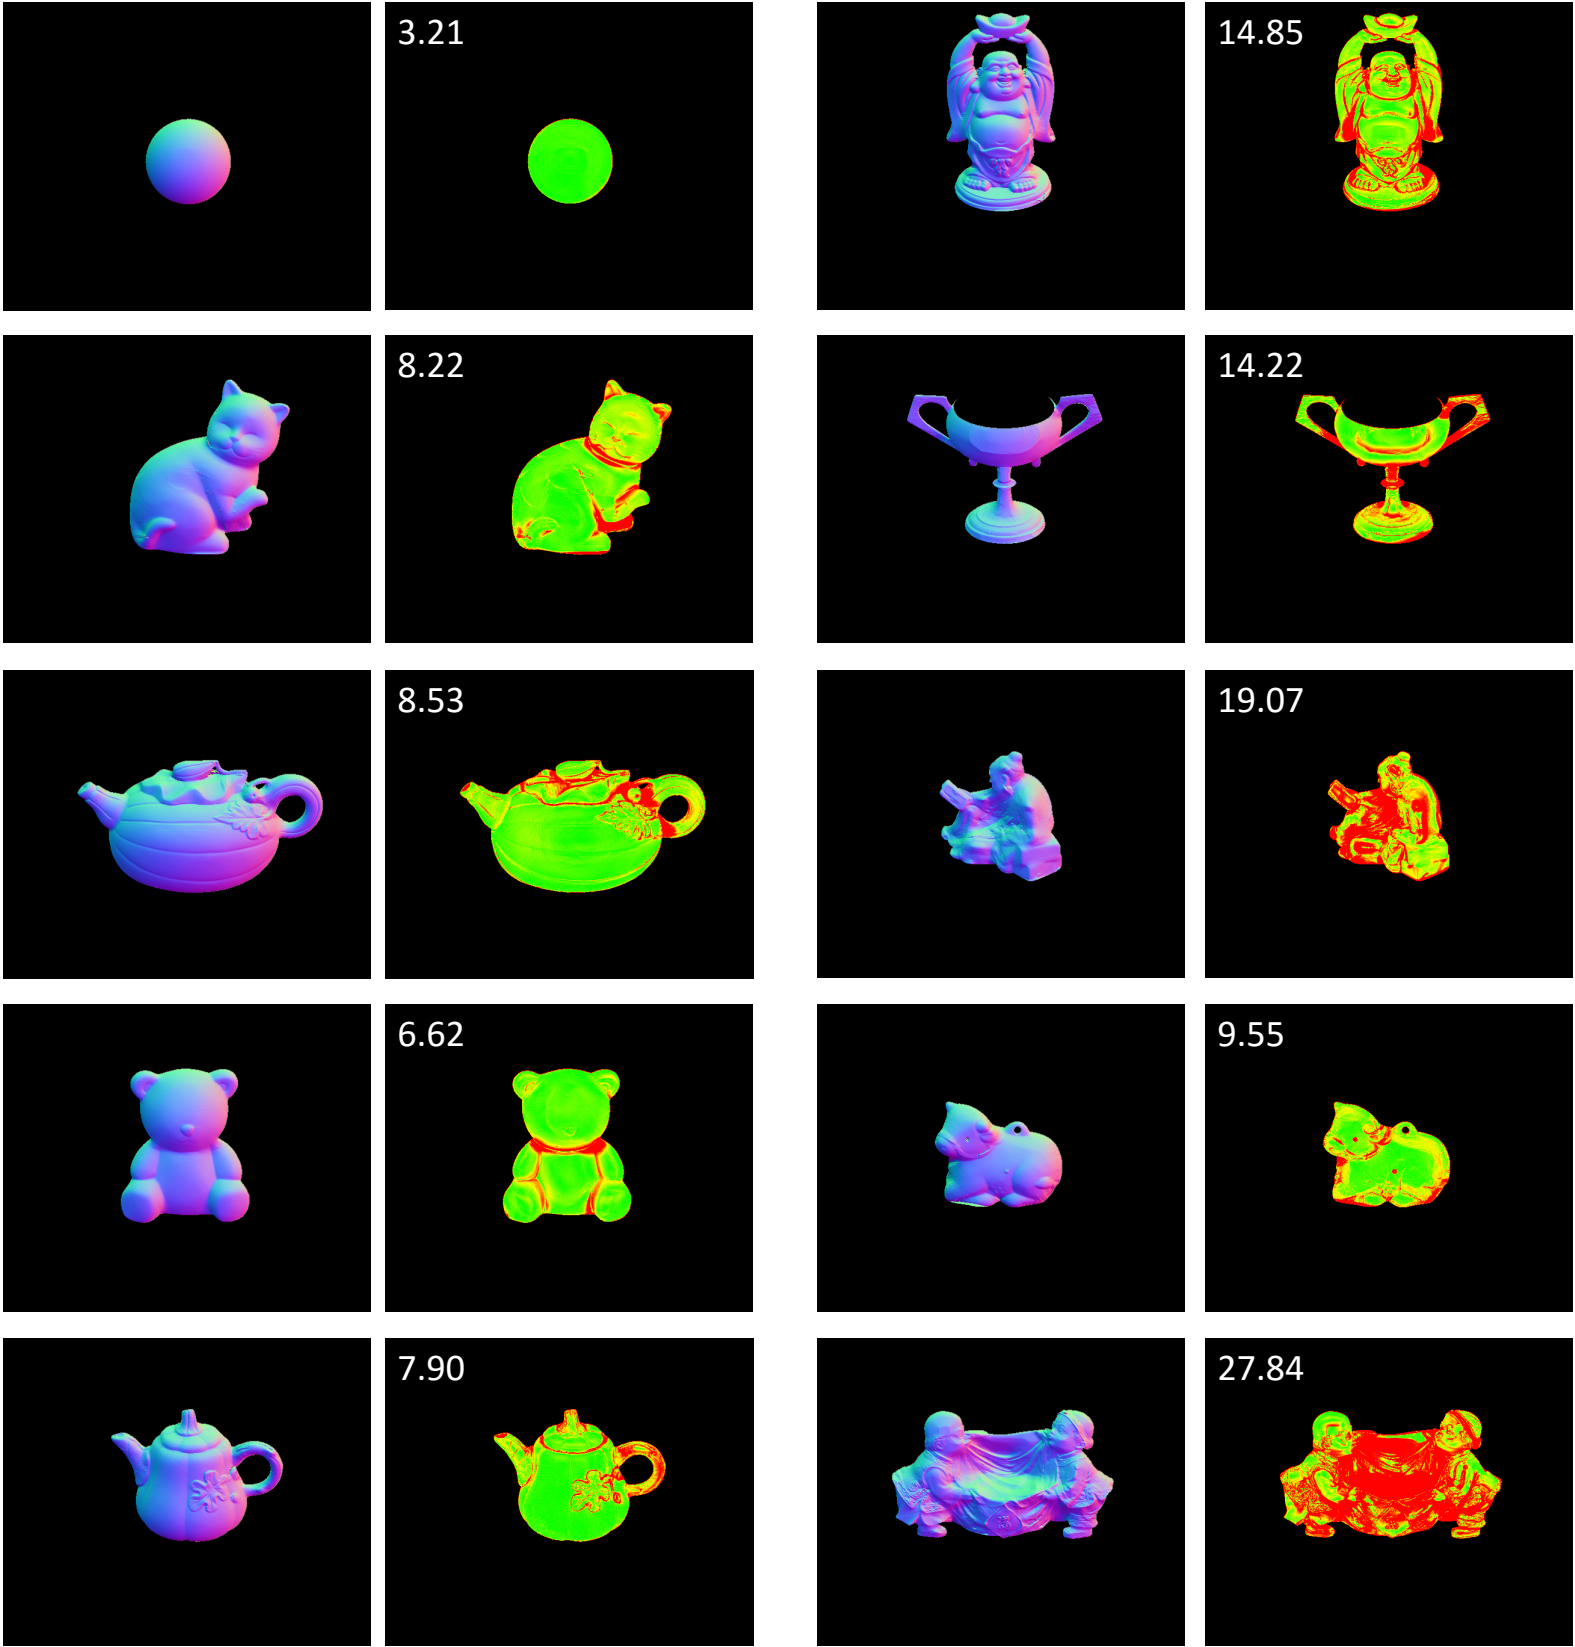

Non-Lambertian methods

AZ08

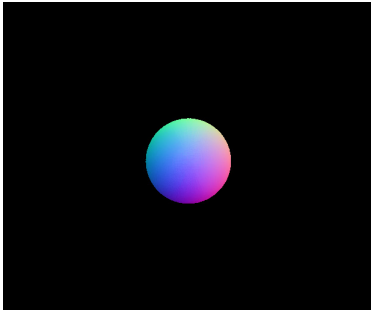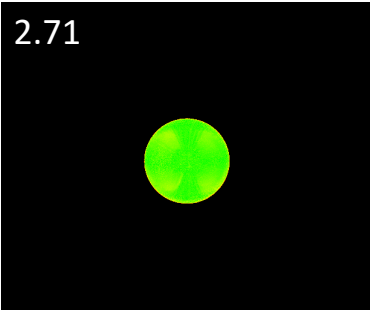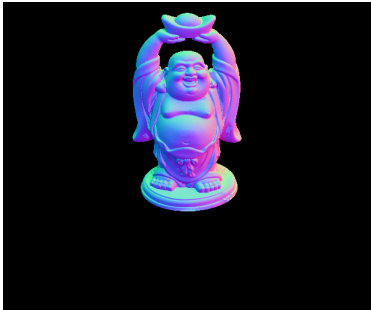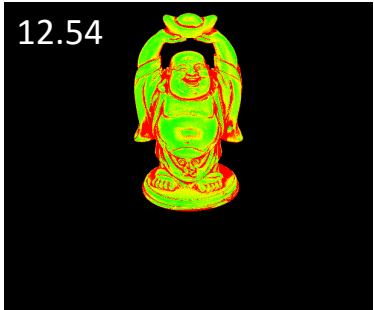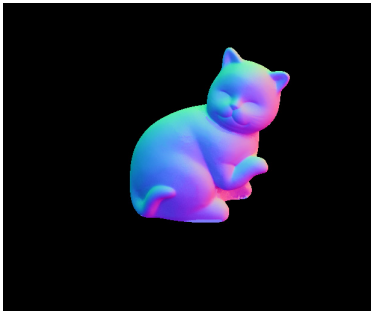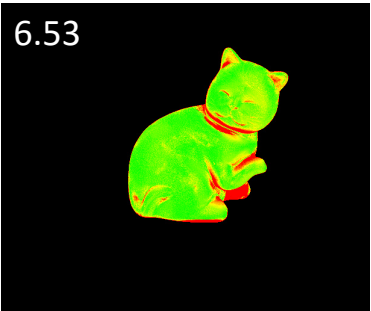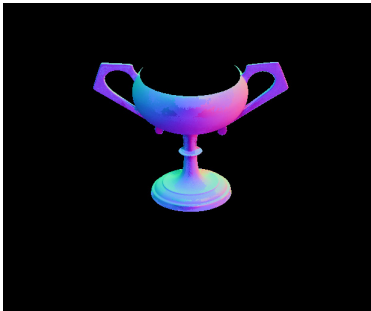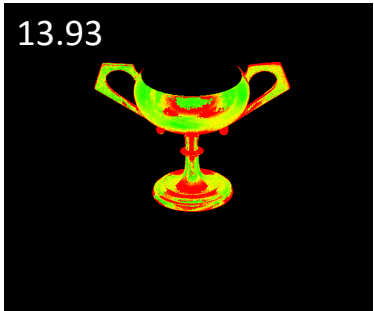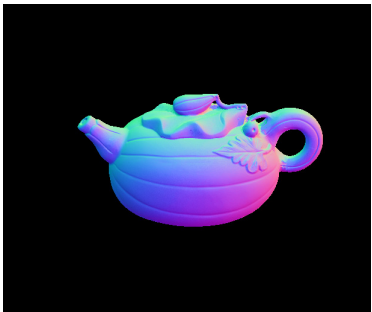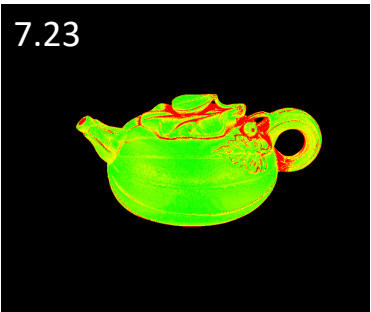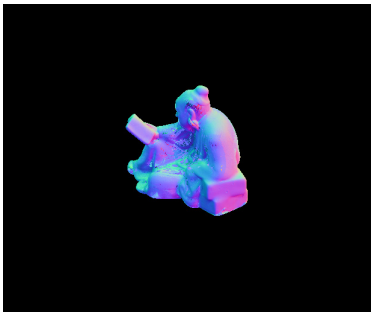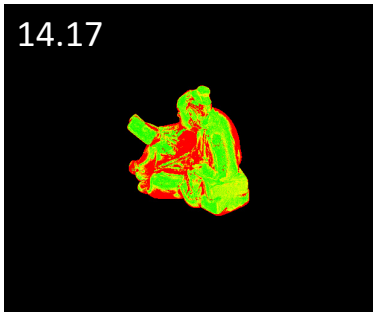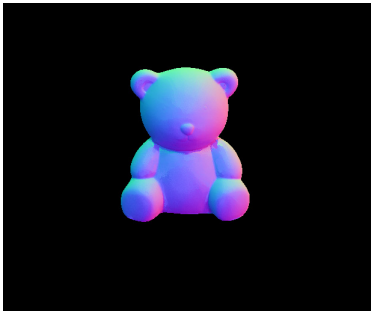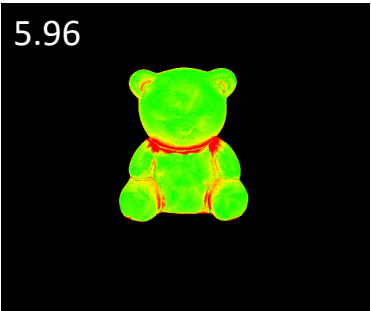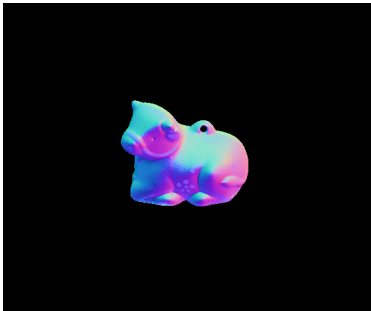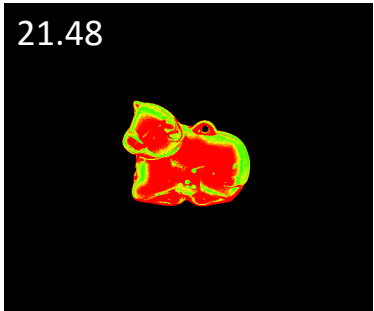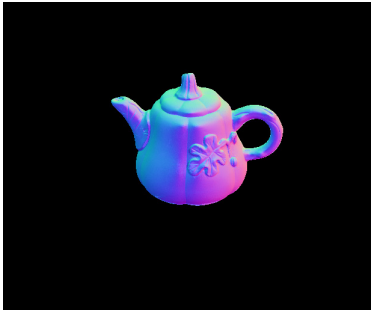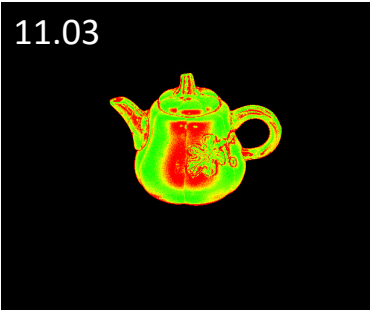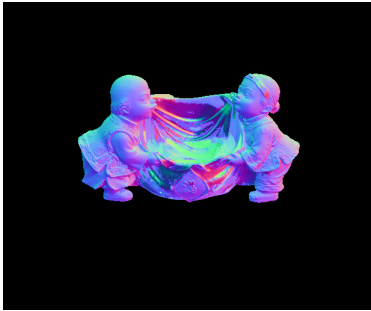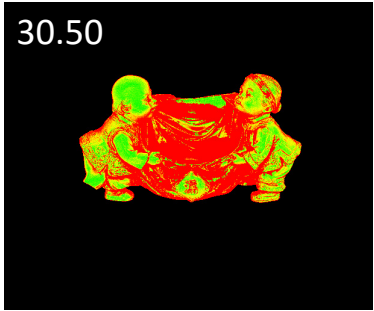

ST12

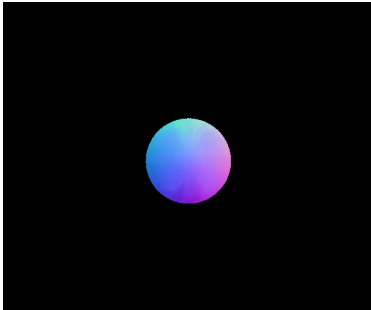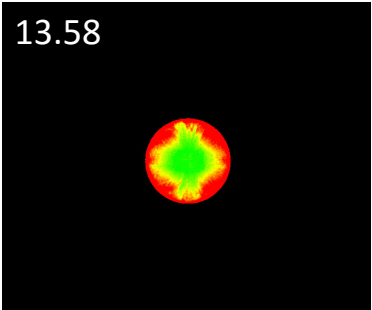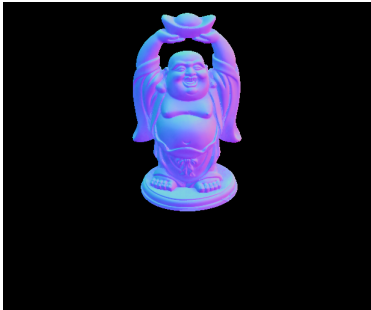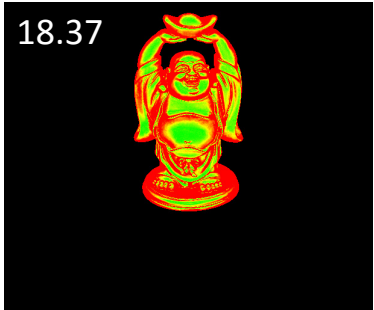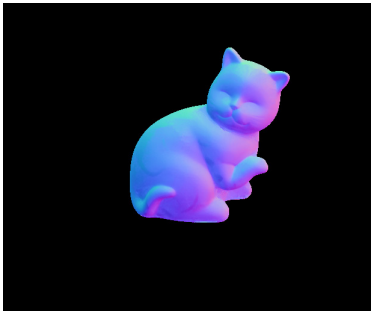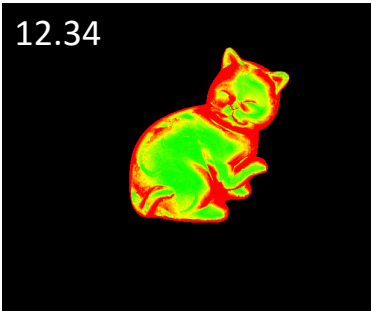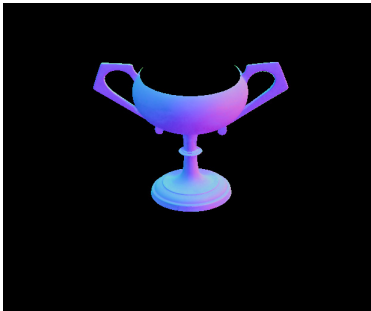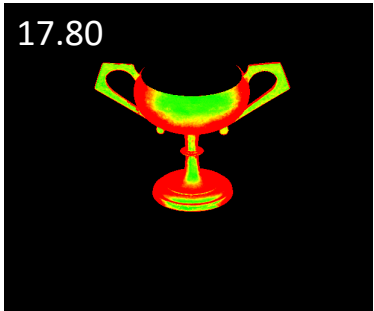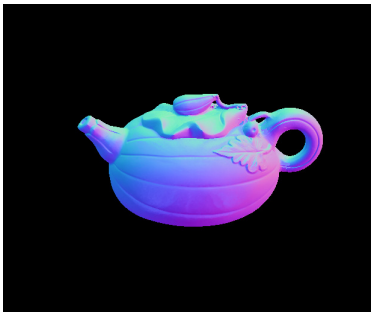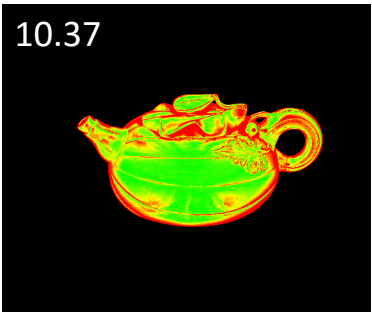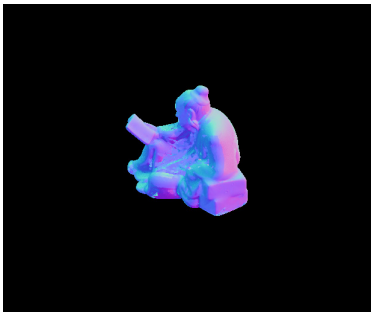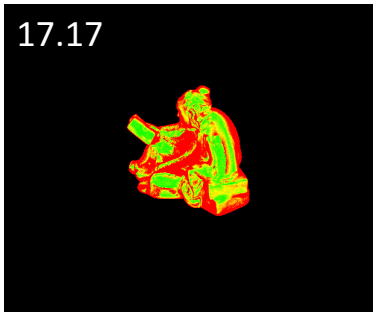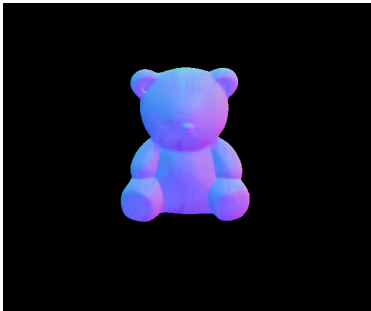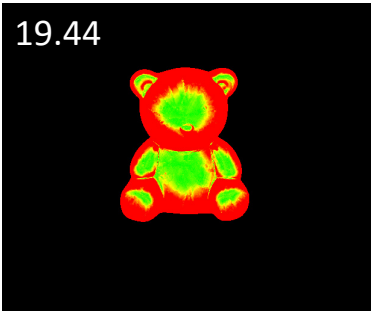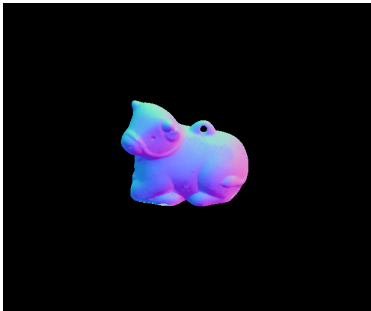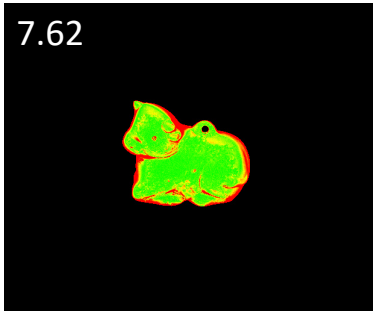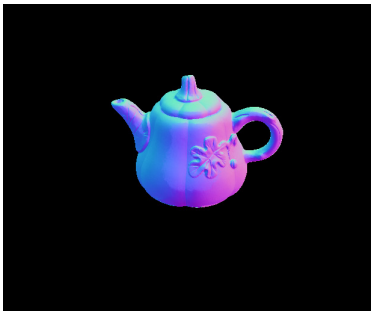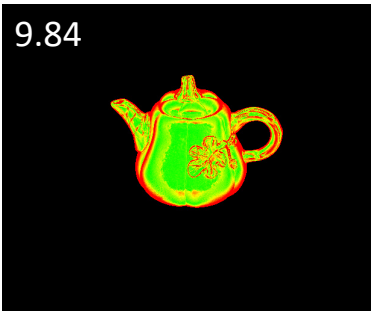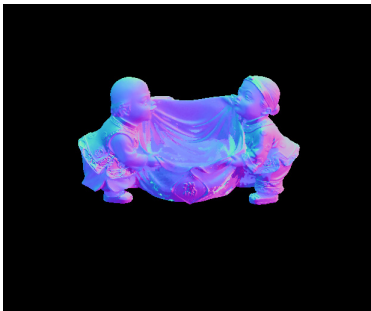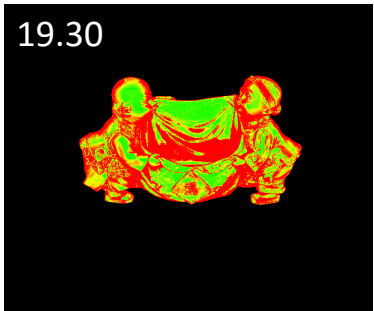

Non-Lambertian methods

HM10

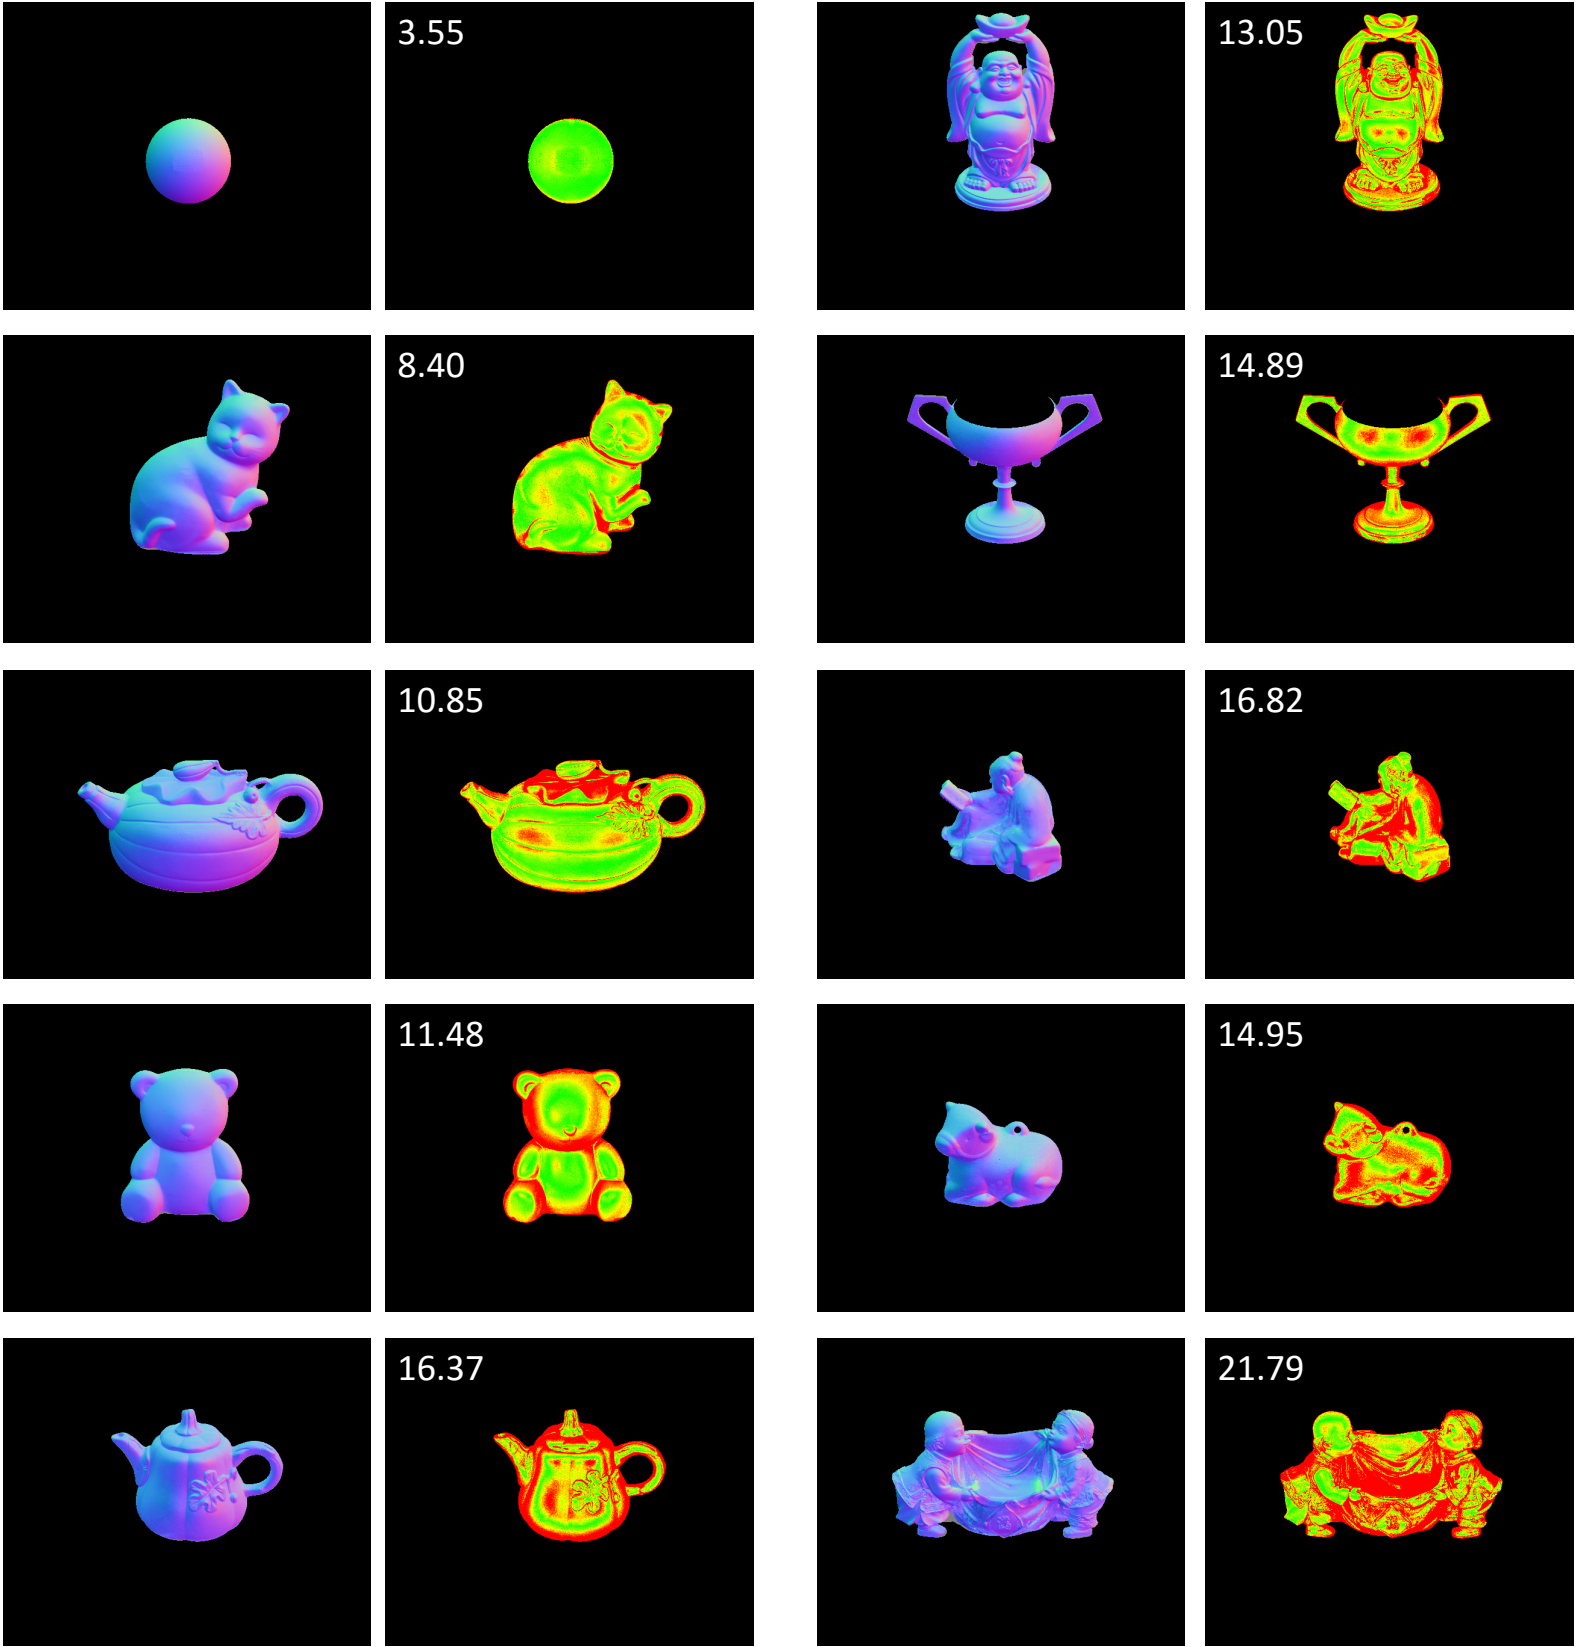

ST14

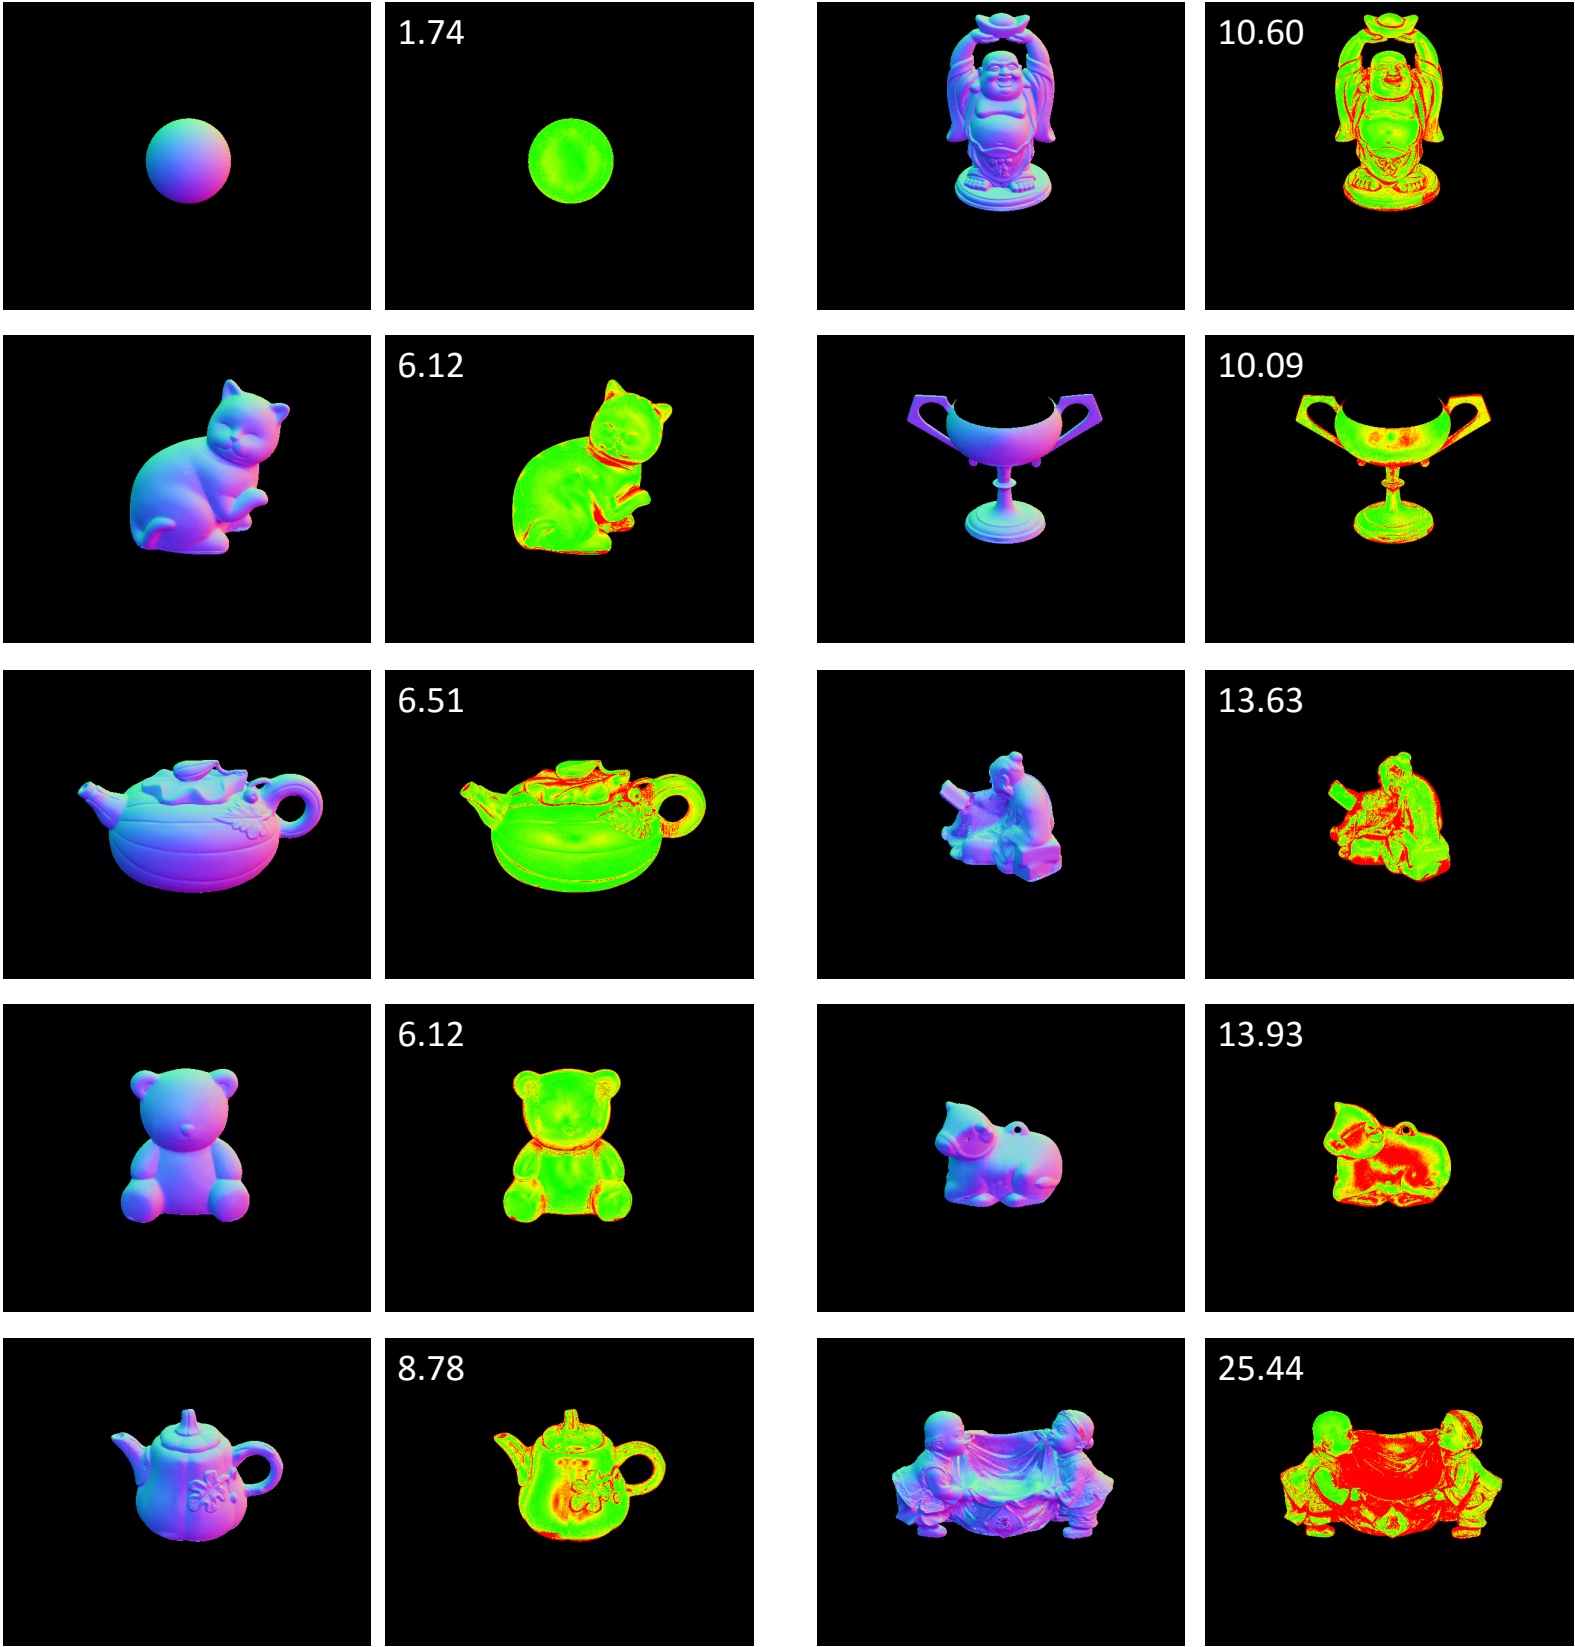

Non-Lambertian methods

IA14

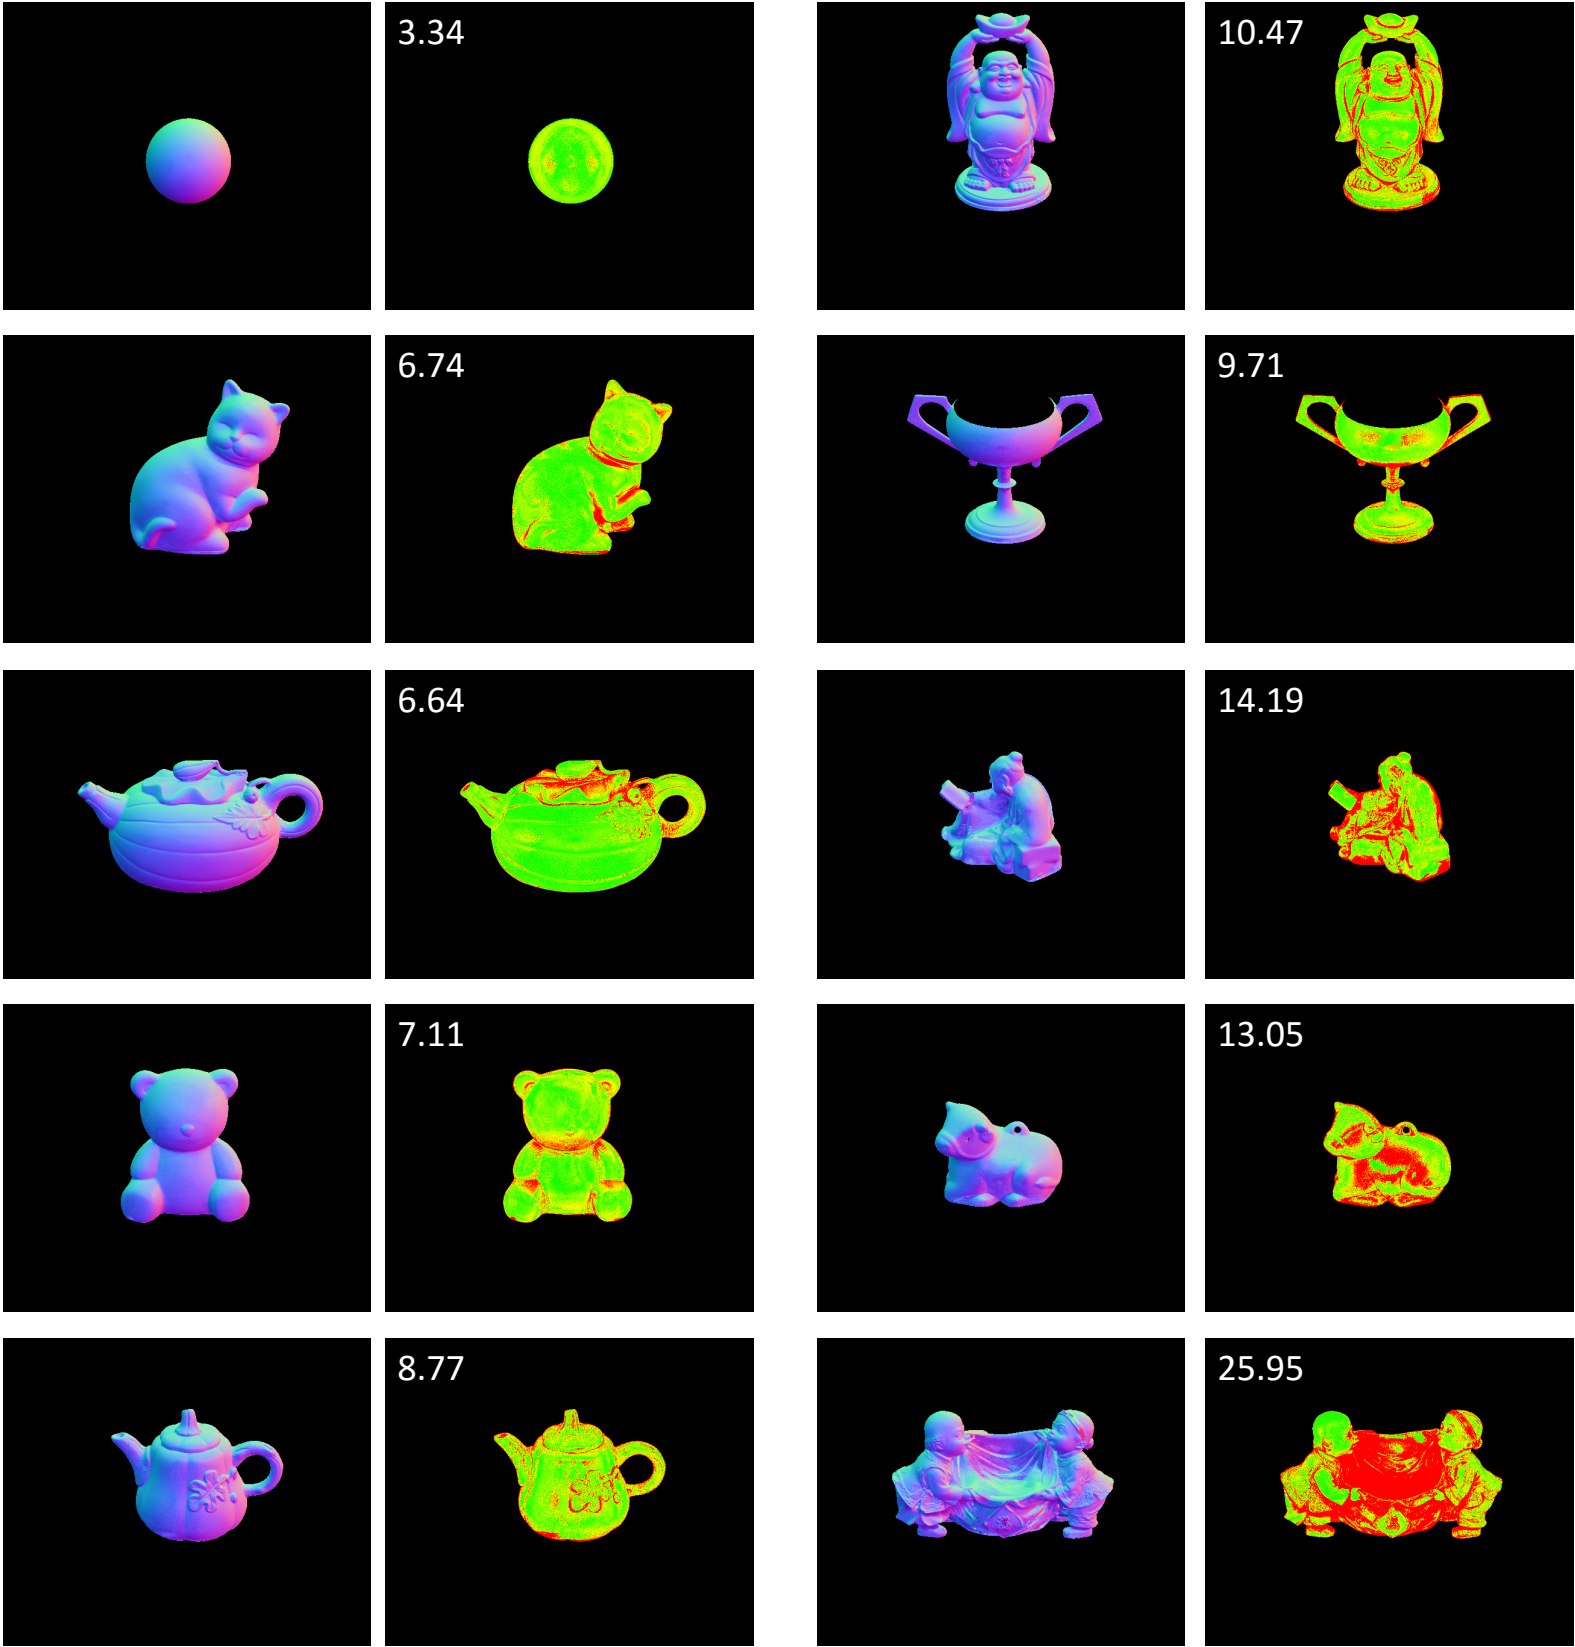



AM07

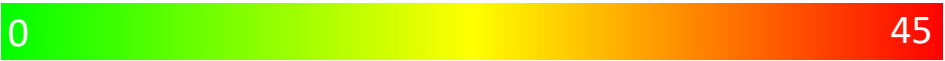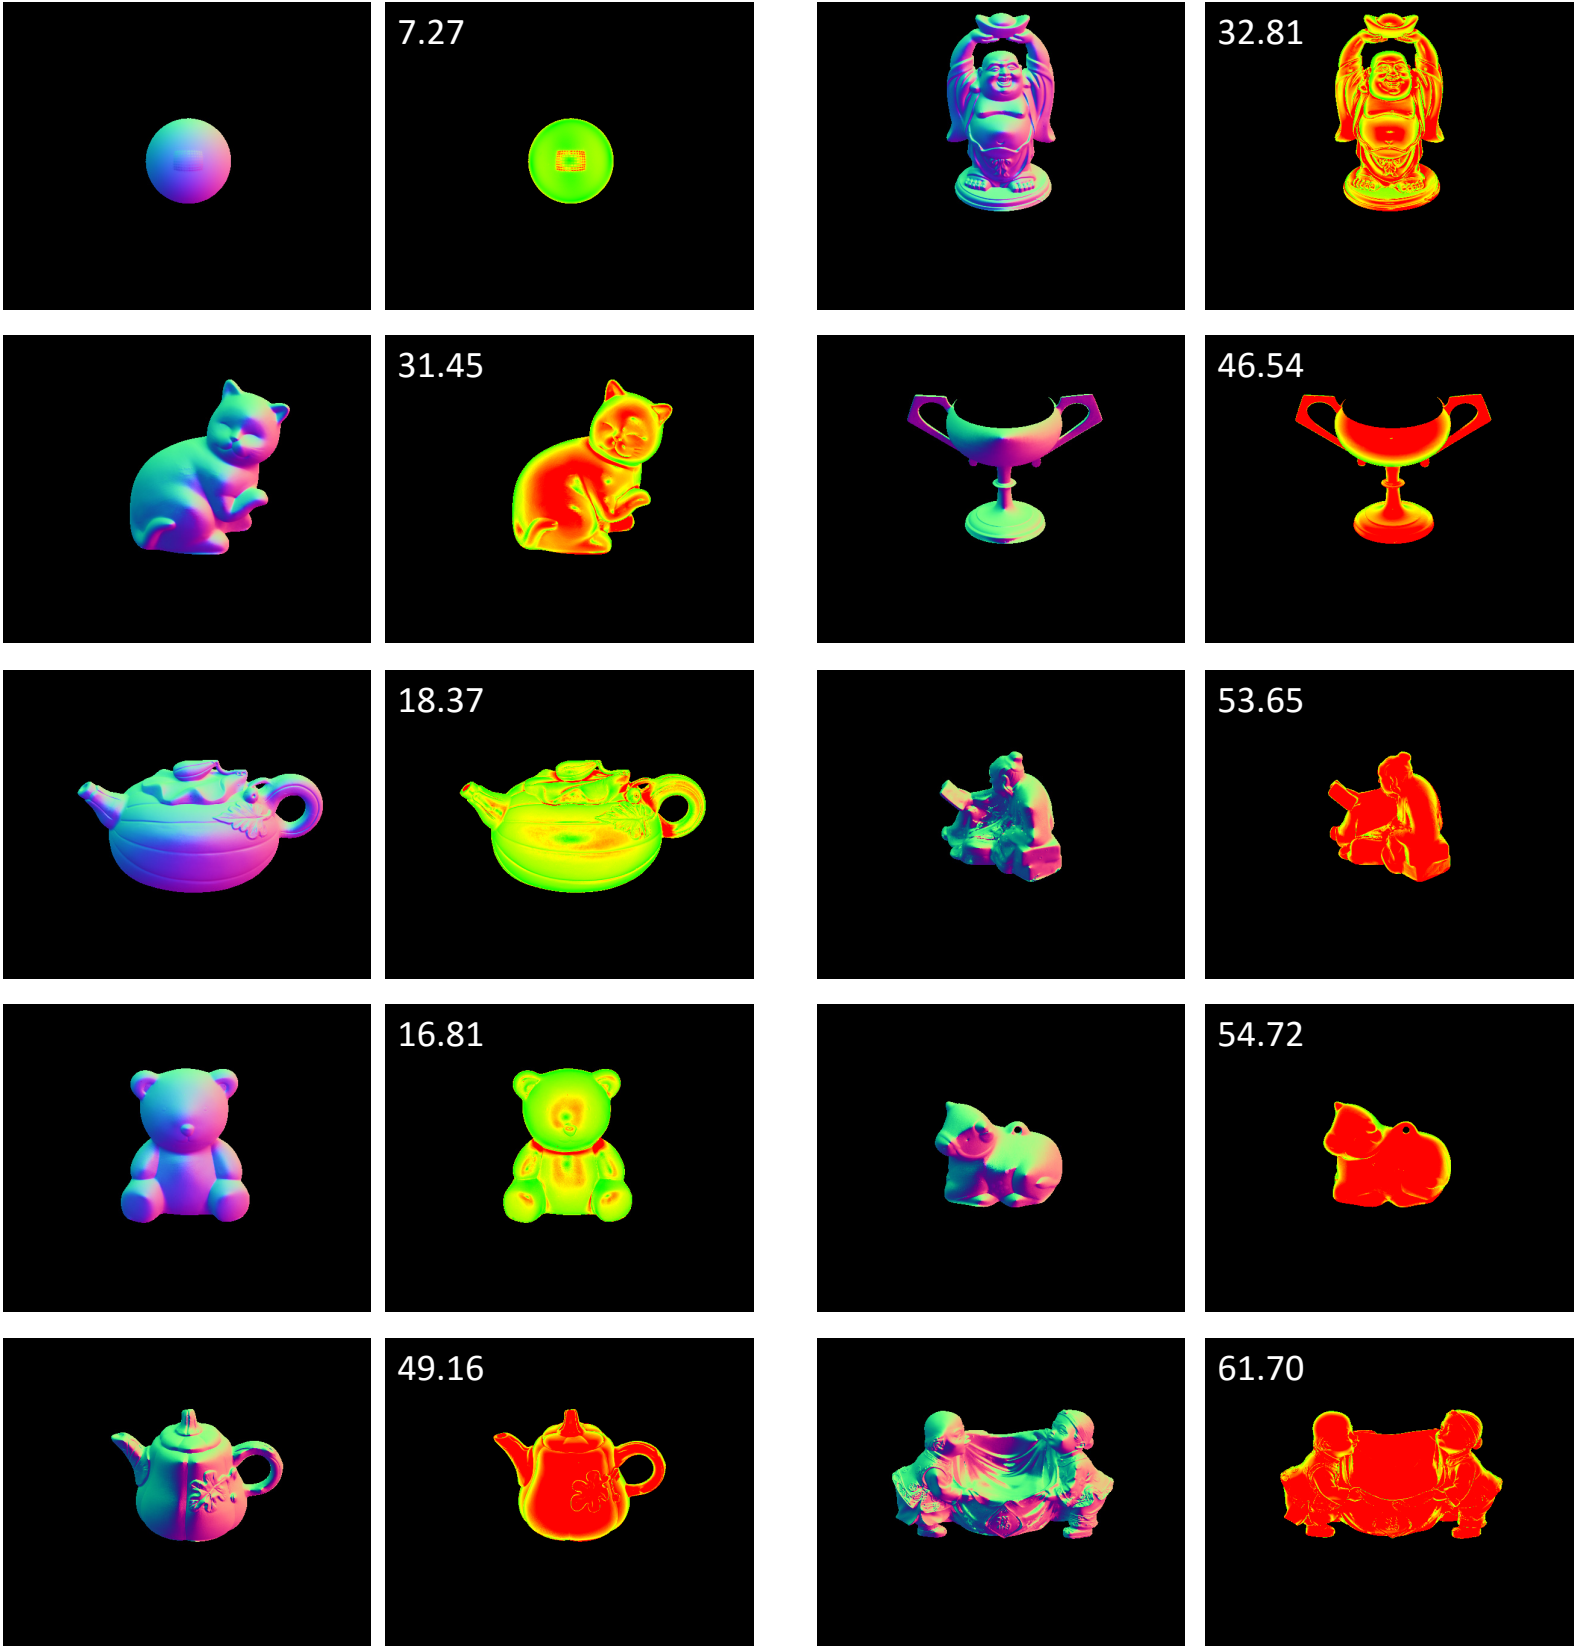

Uncalibrated methods

SM10

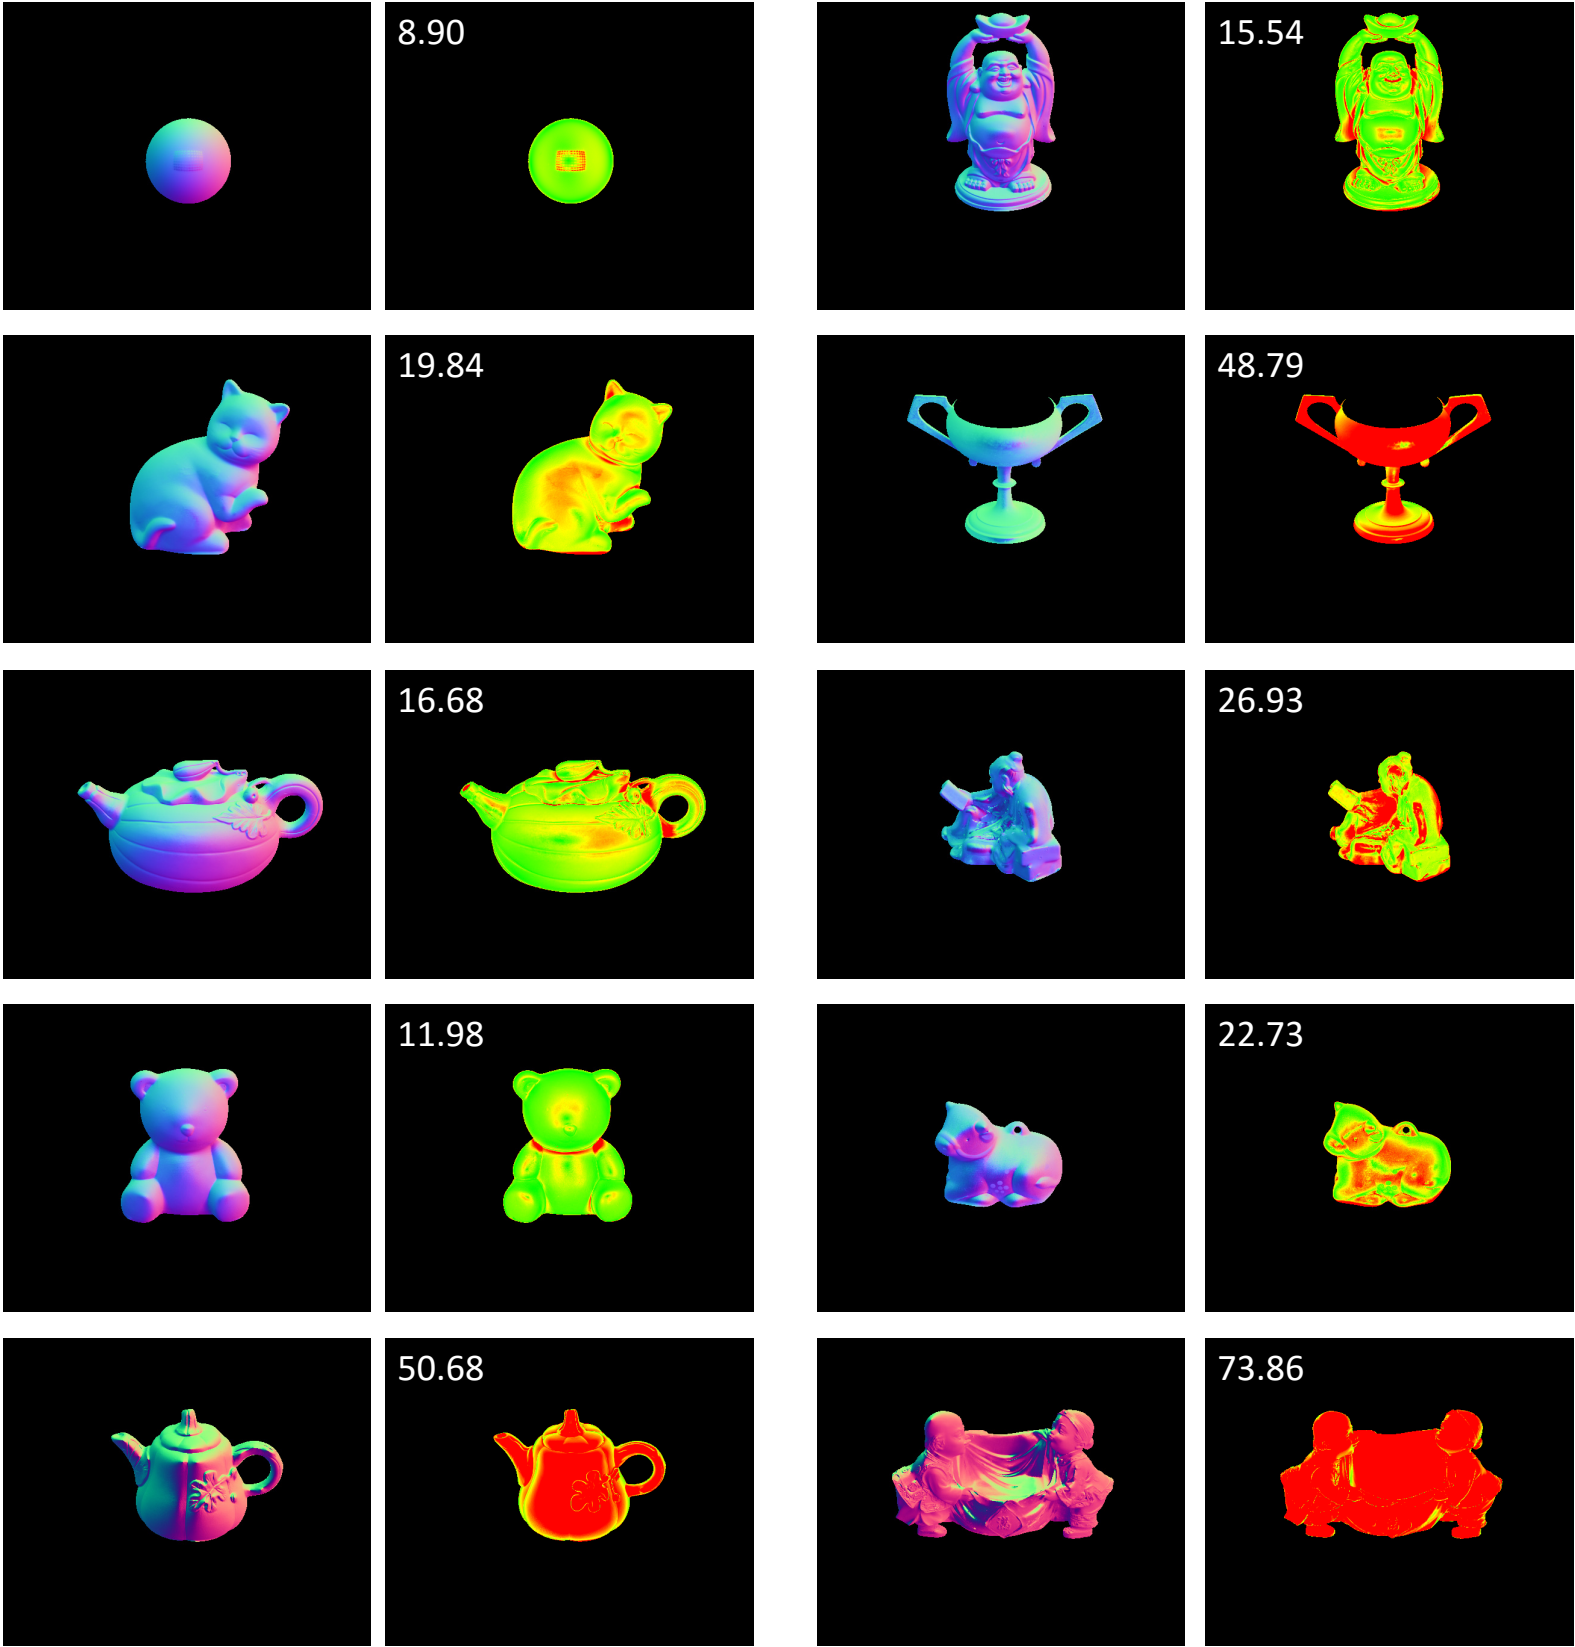



PF14

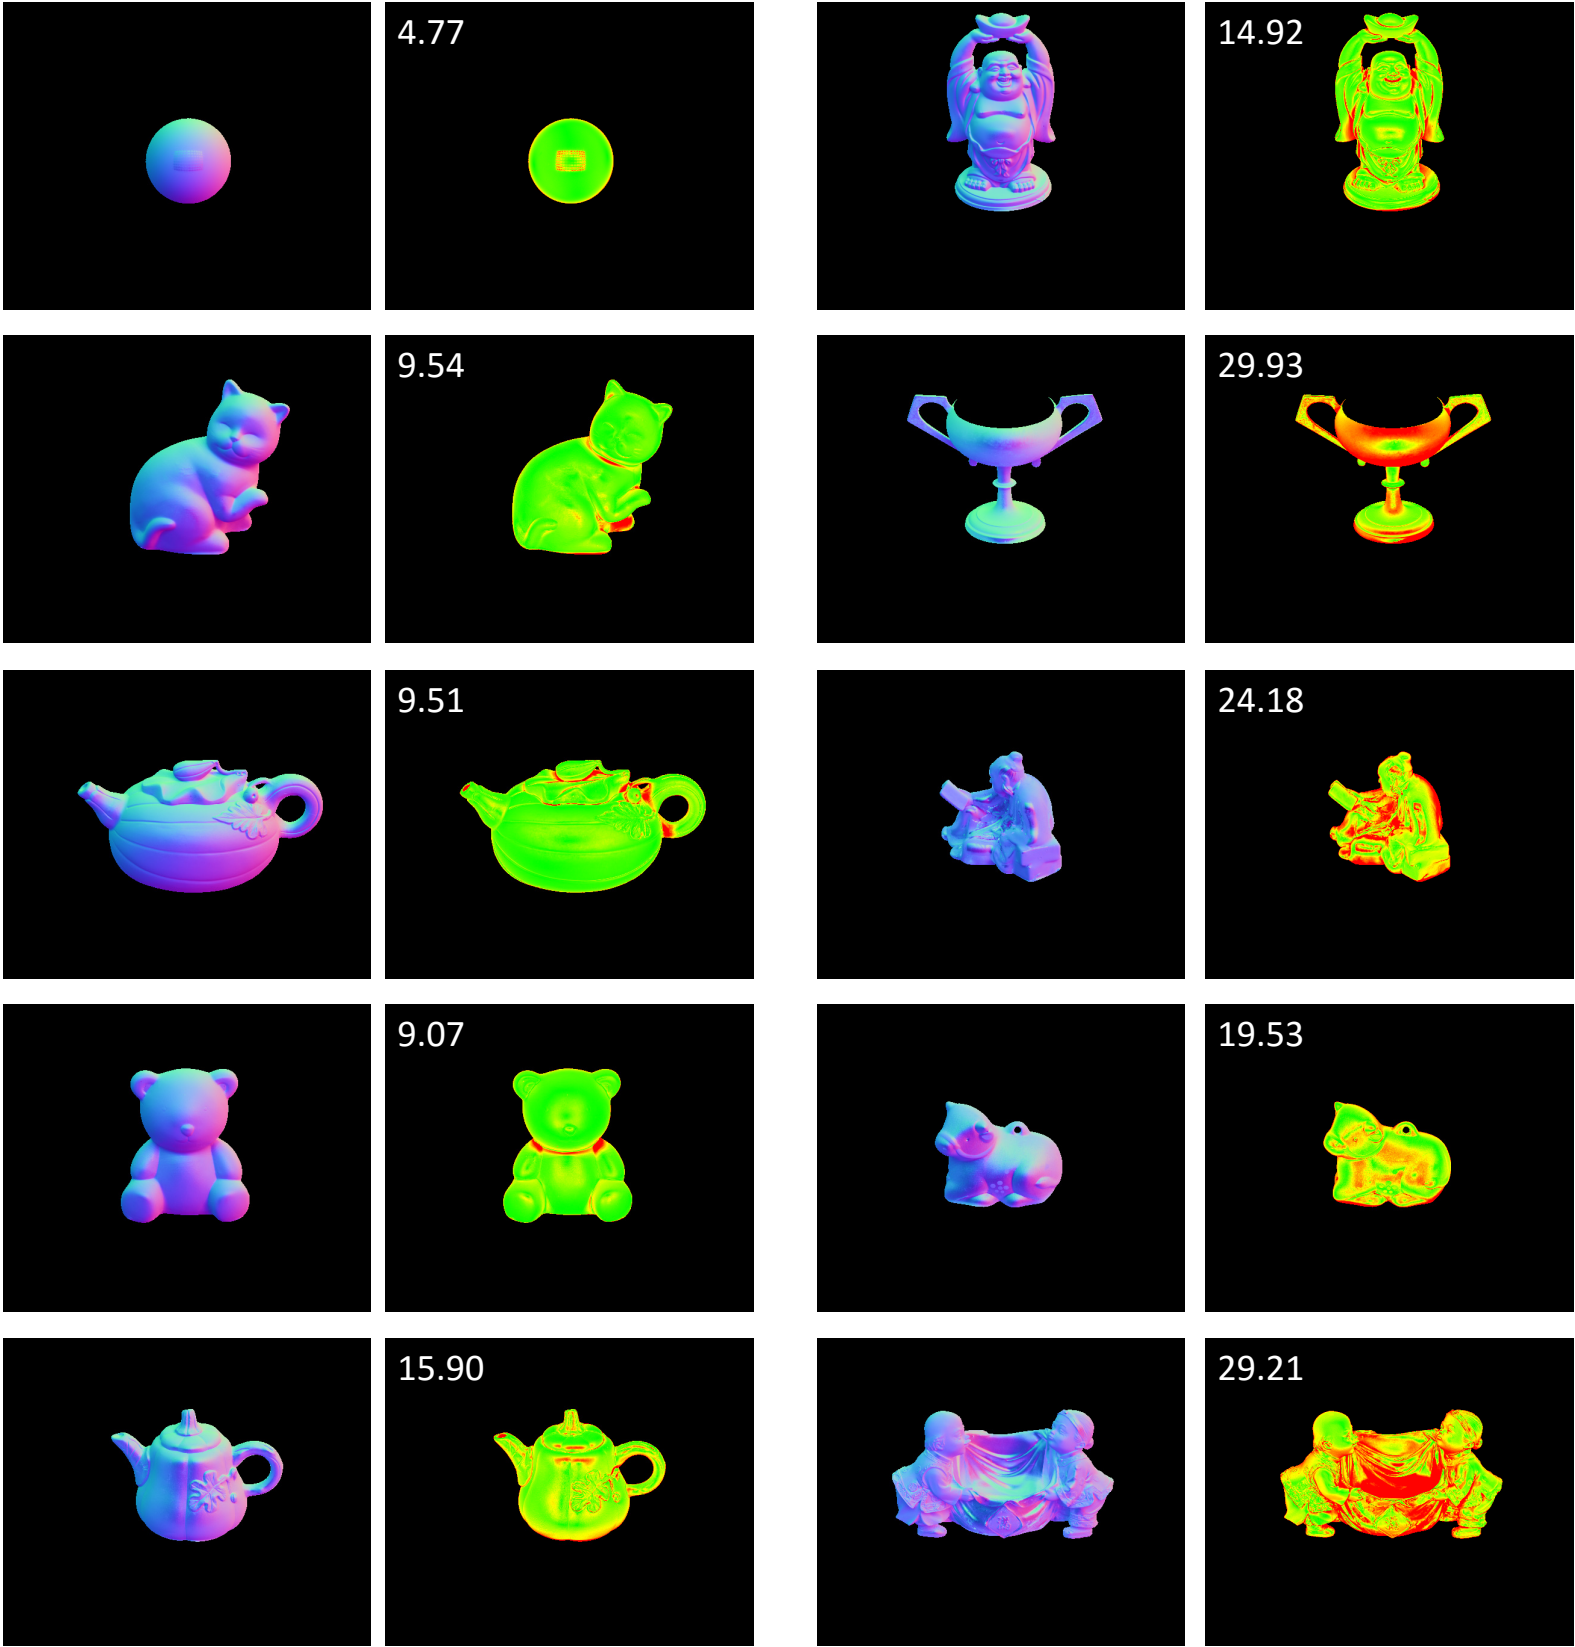

WT13

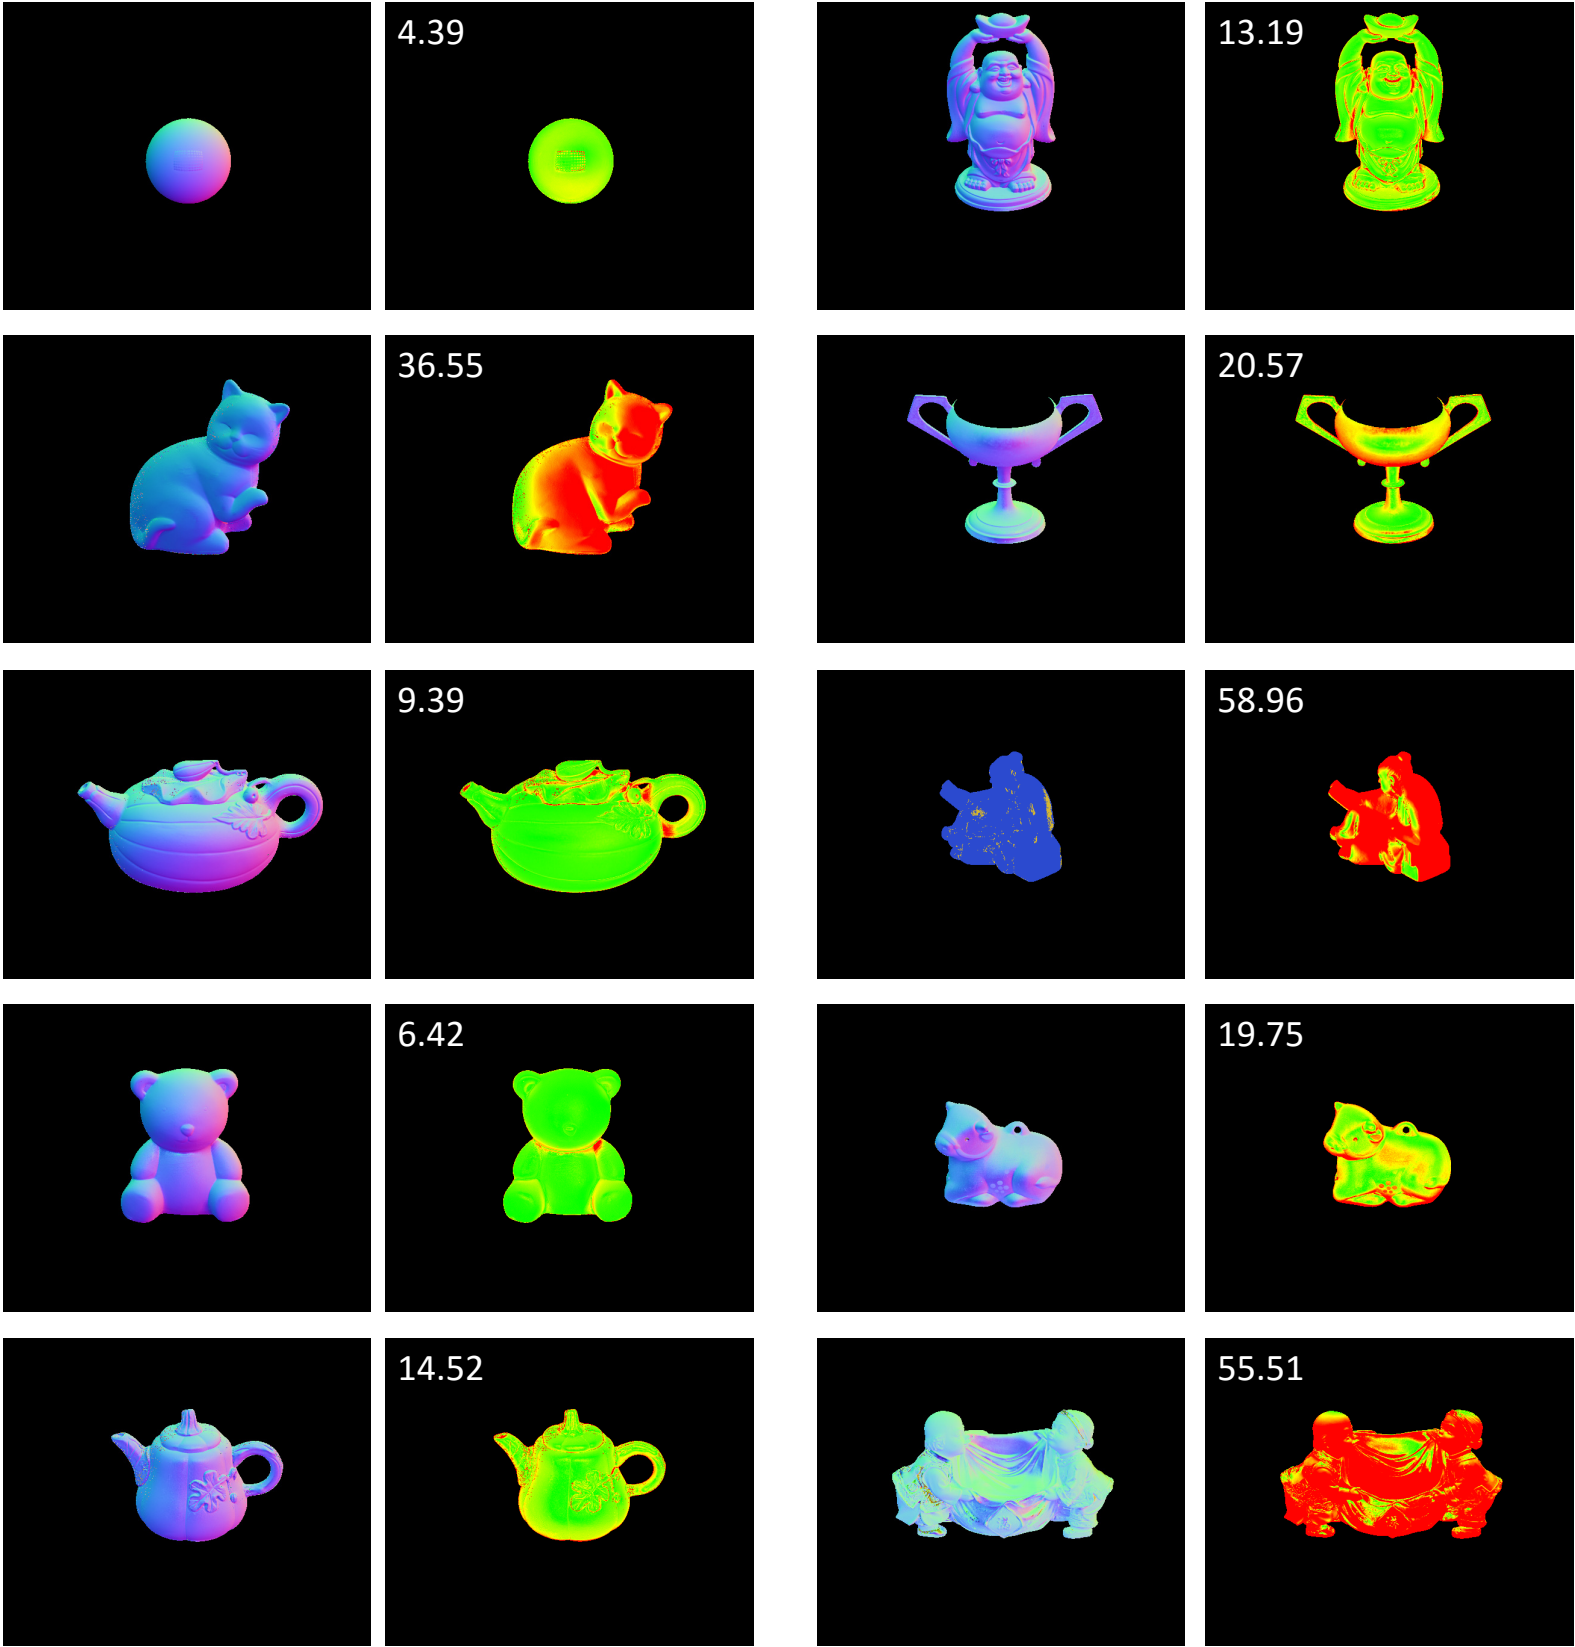

Uncalibrated methods

LM13

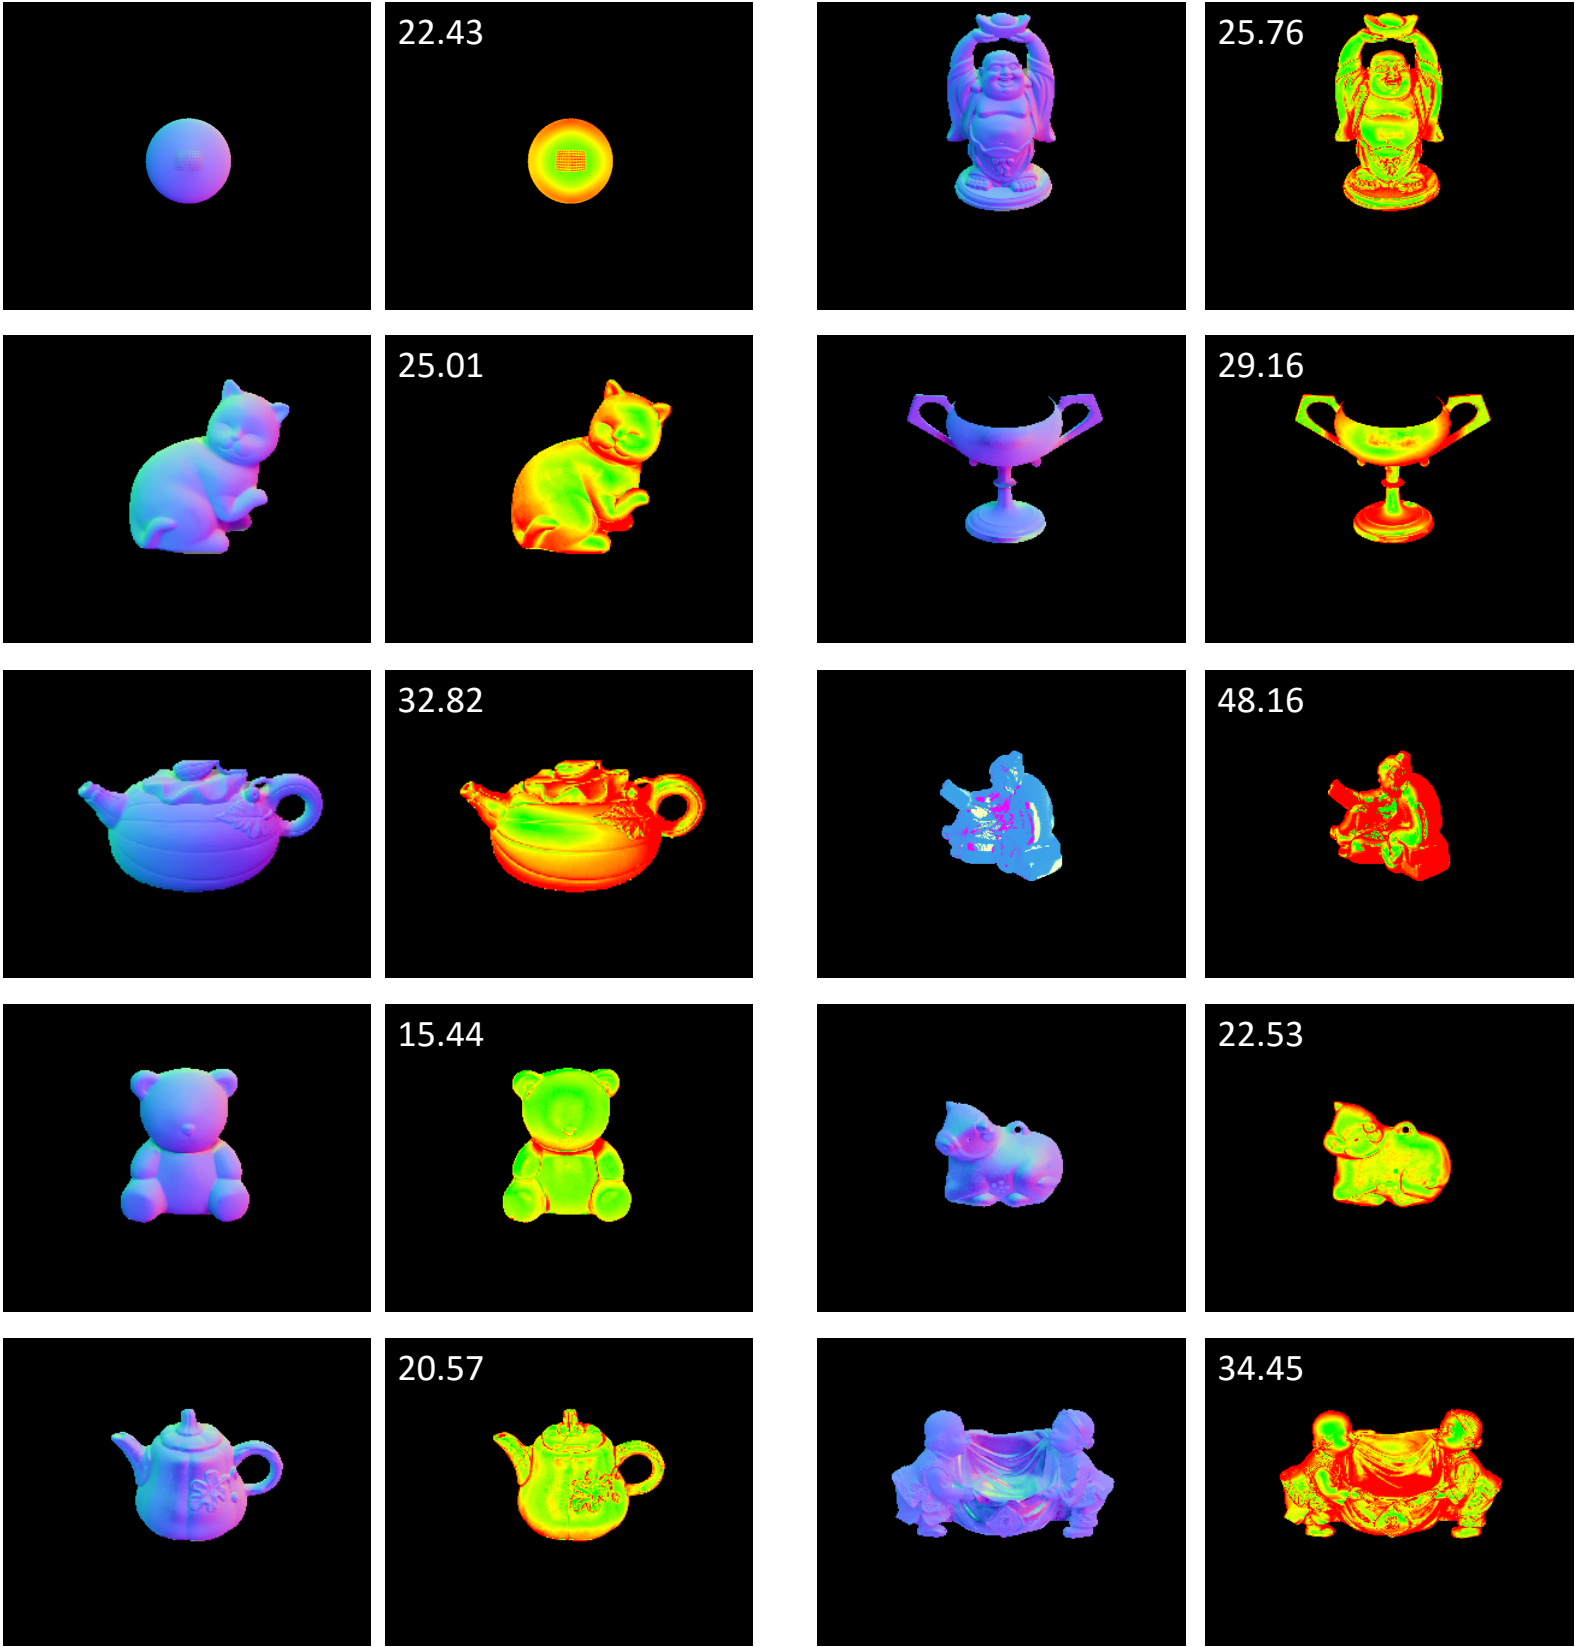

Uncalibrated methods

Opt. A

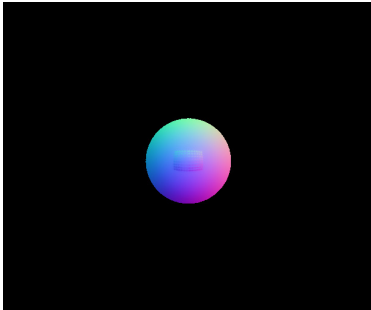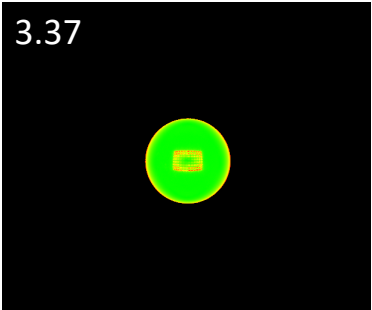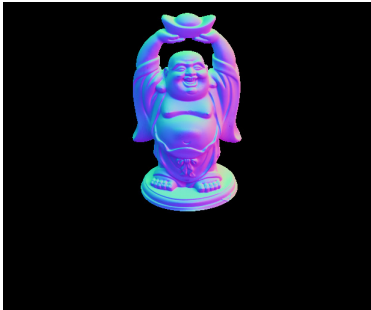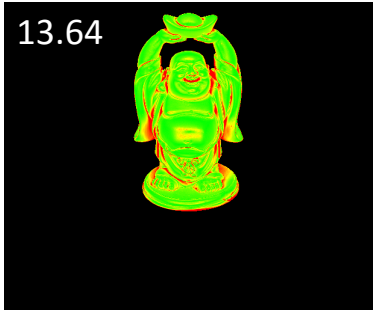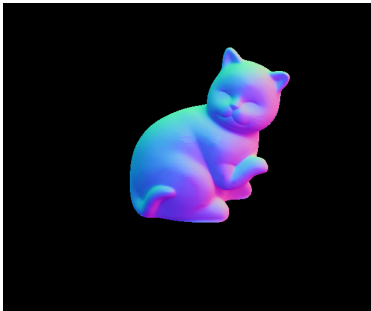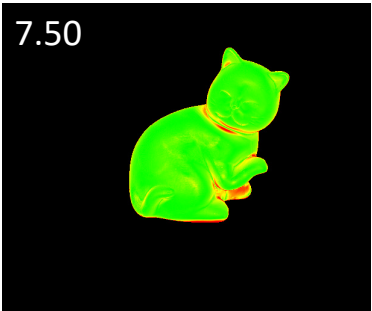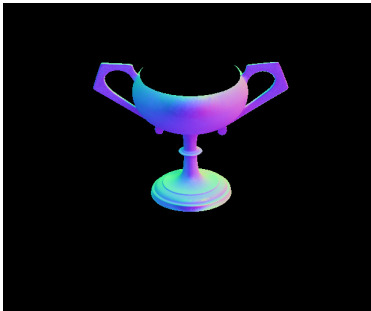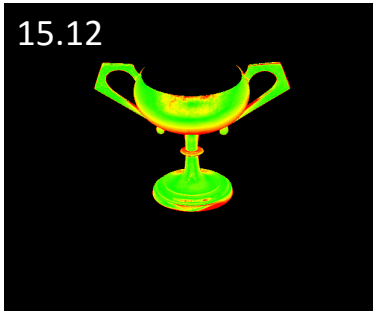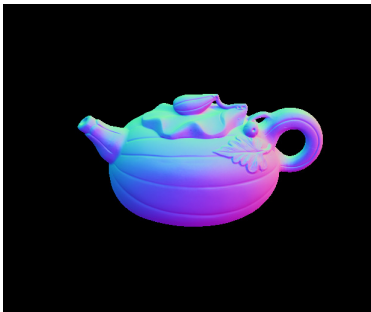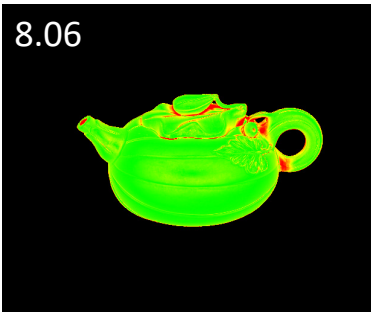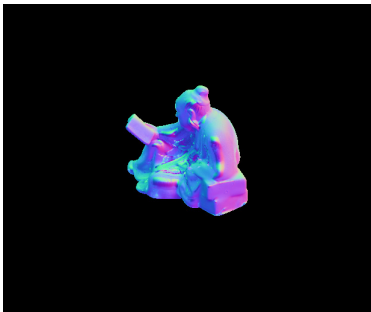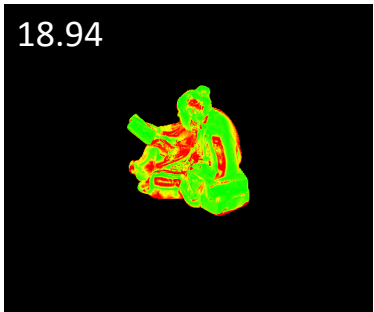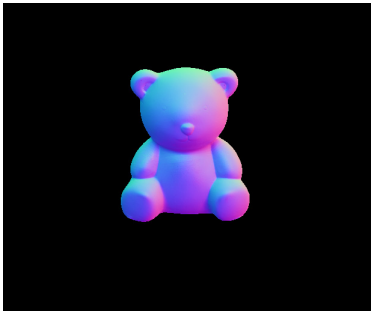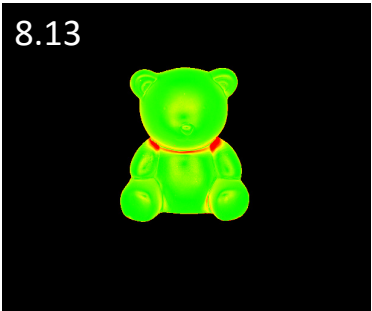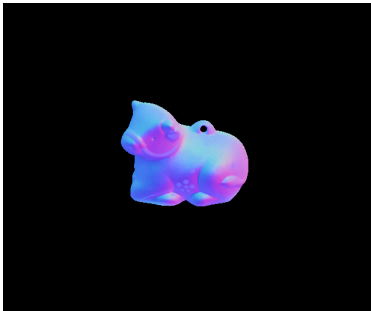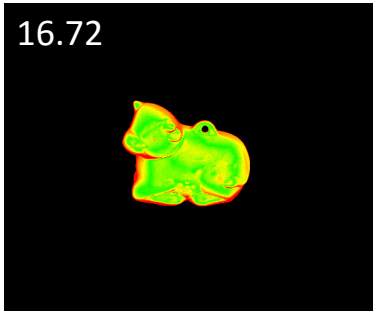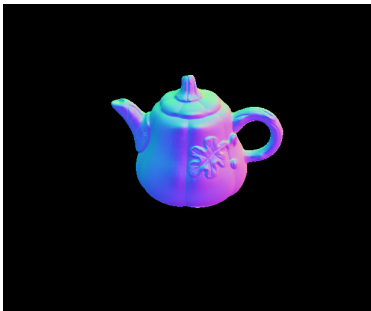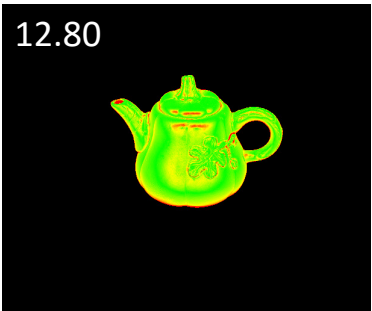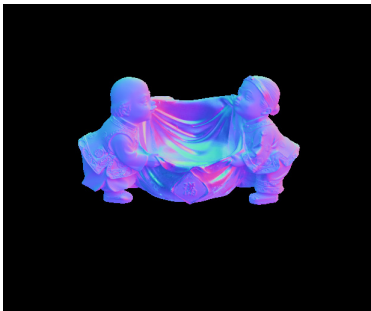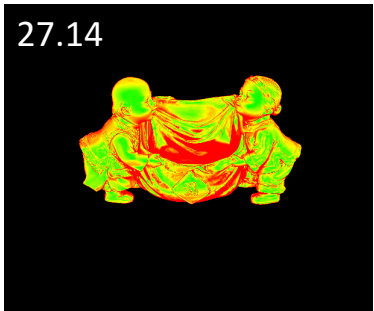

Uncalibrated methods

Opt. G

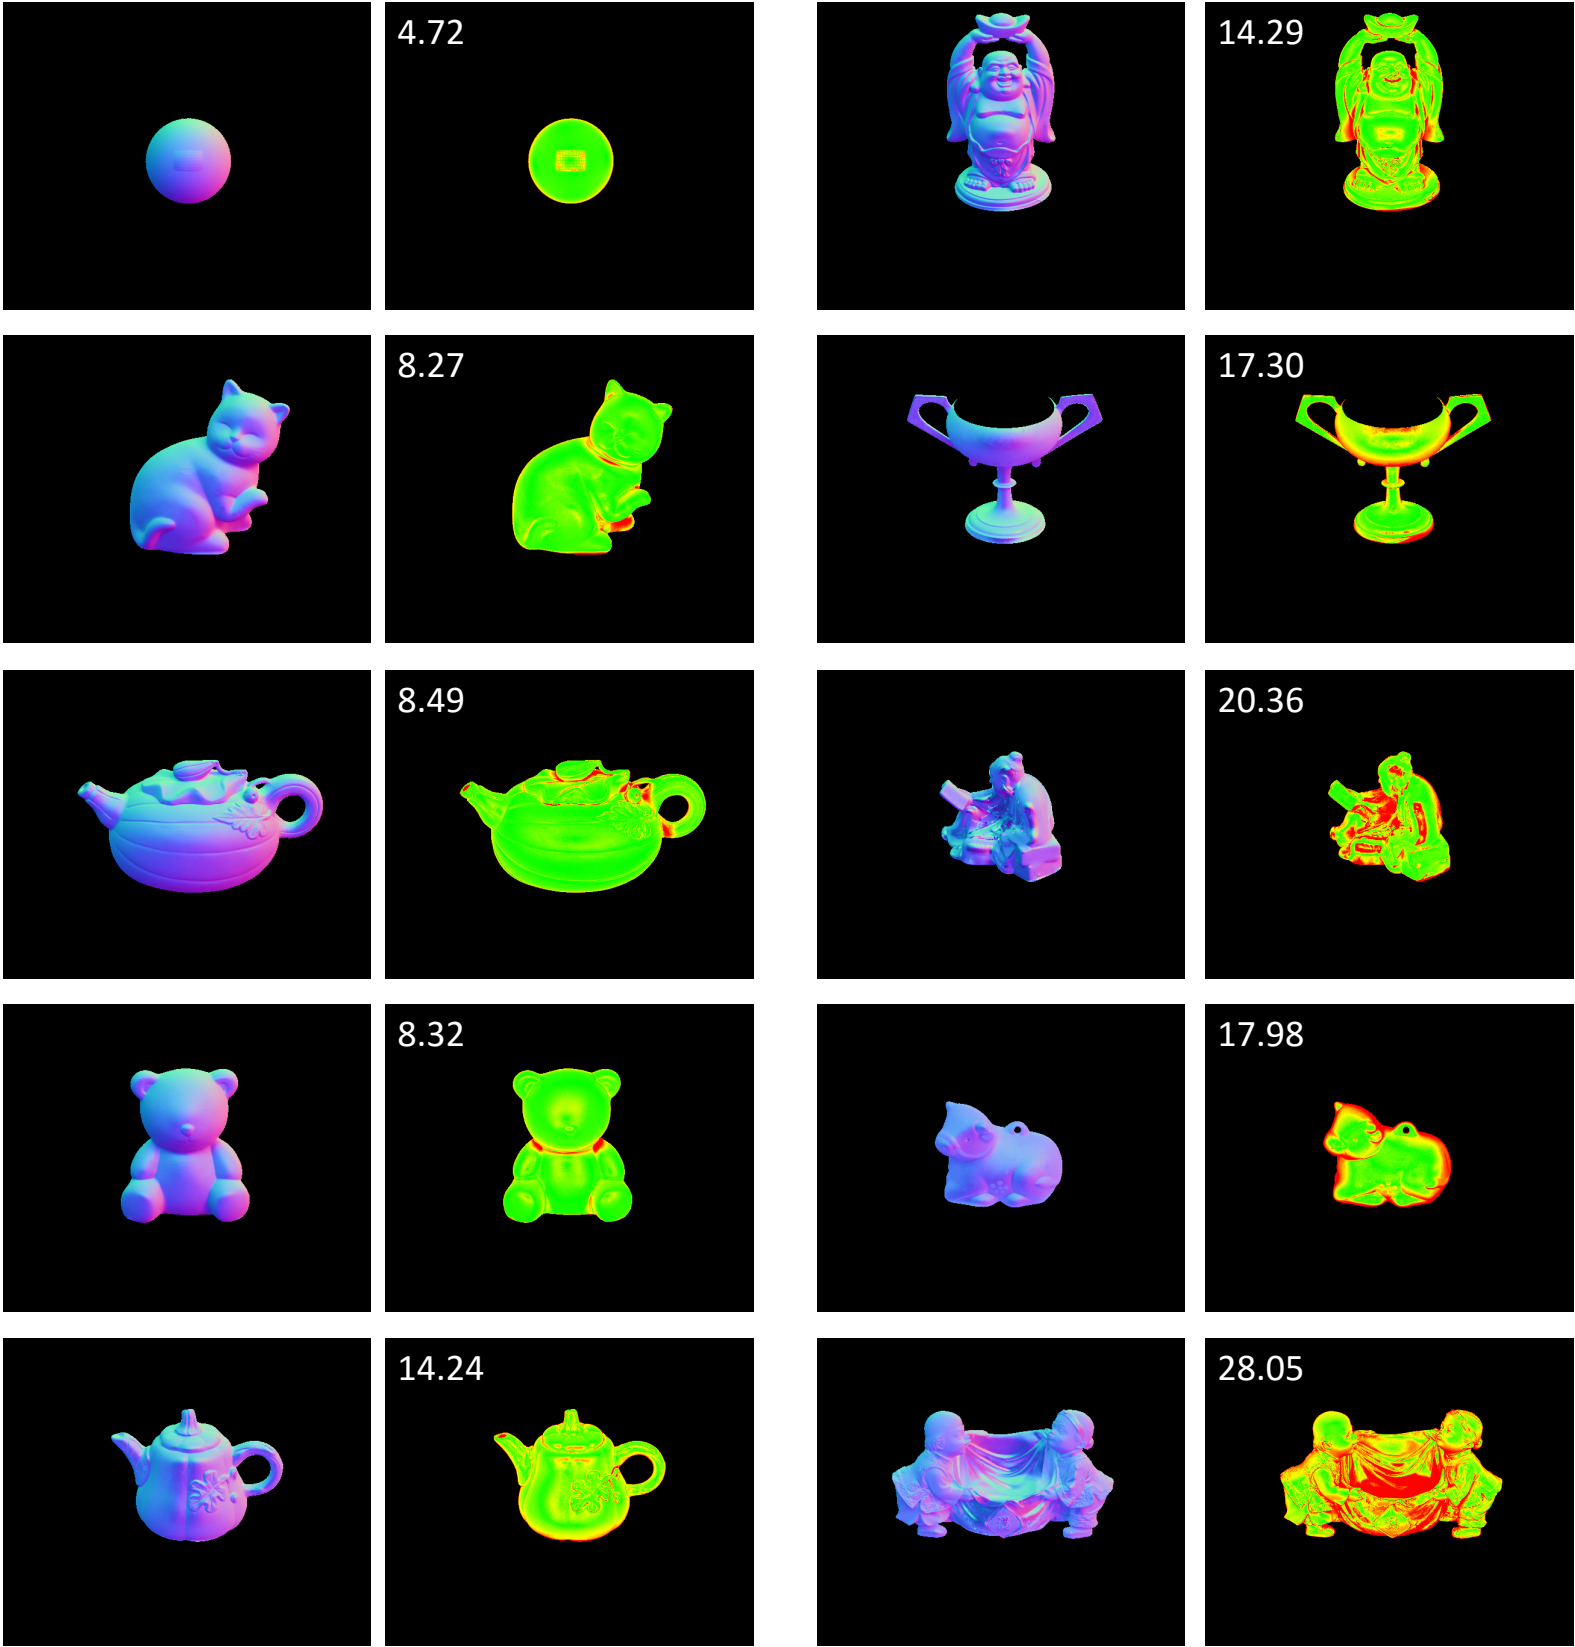

Supplement: Supplementary file 1 [file Shi_A_Benchmark_Dataset_2016_CVPR_supplemental.pdf]
